# Supplementary material for: Complementary dual-virus strategy drives synthetic target and cognate T-cell engager expression for endogenous-antigen agnostic immunotherapy
Source: PubMed Central journal article supplement — Nat Commun. 2024 Aug 23;15:7267. doi: 10.1038/s41467-024-51498-0 (PMC11343834; doi:10.1038/s41467-024-51498-0), 2024-08-23
Supplement: 41467_2024_51498_MOESM1_ESM.pdf [file 41467_2024_51498_MOESM1_ESM.pdf]

# Supplementary Fig. 1

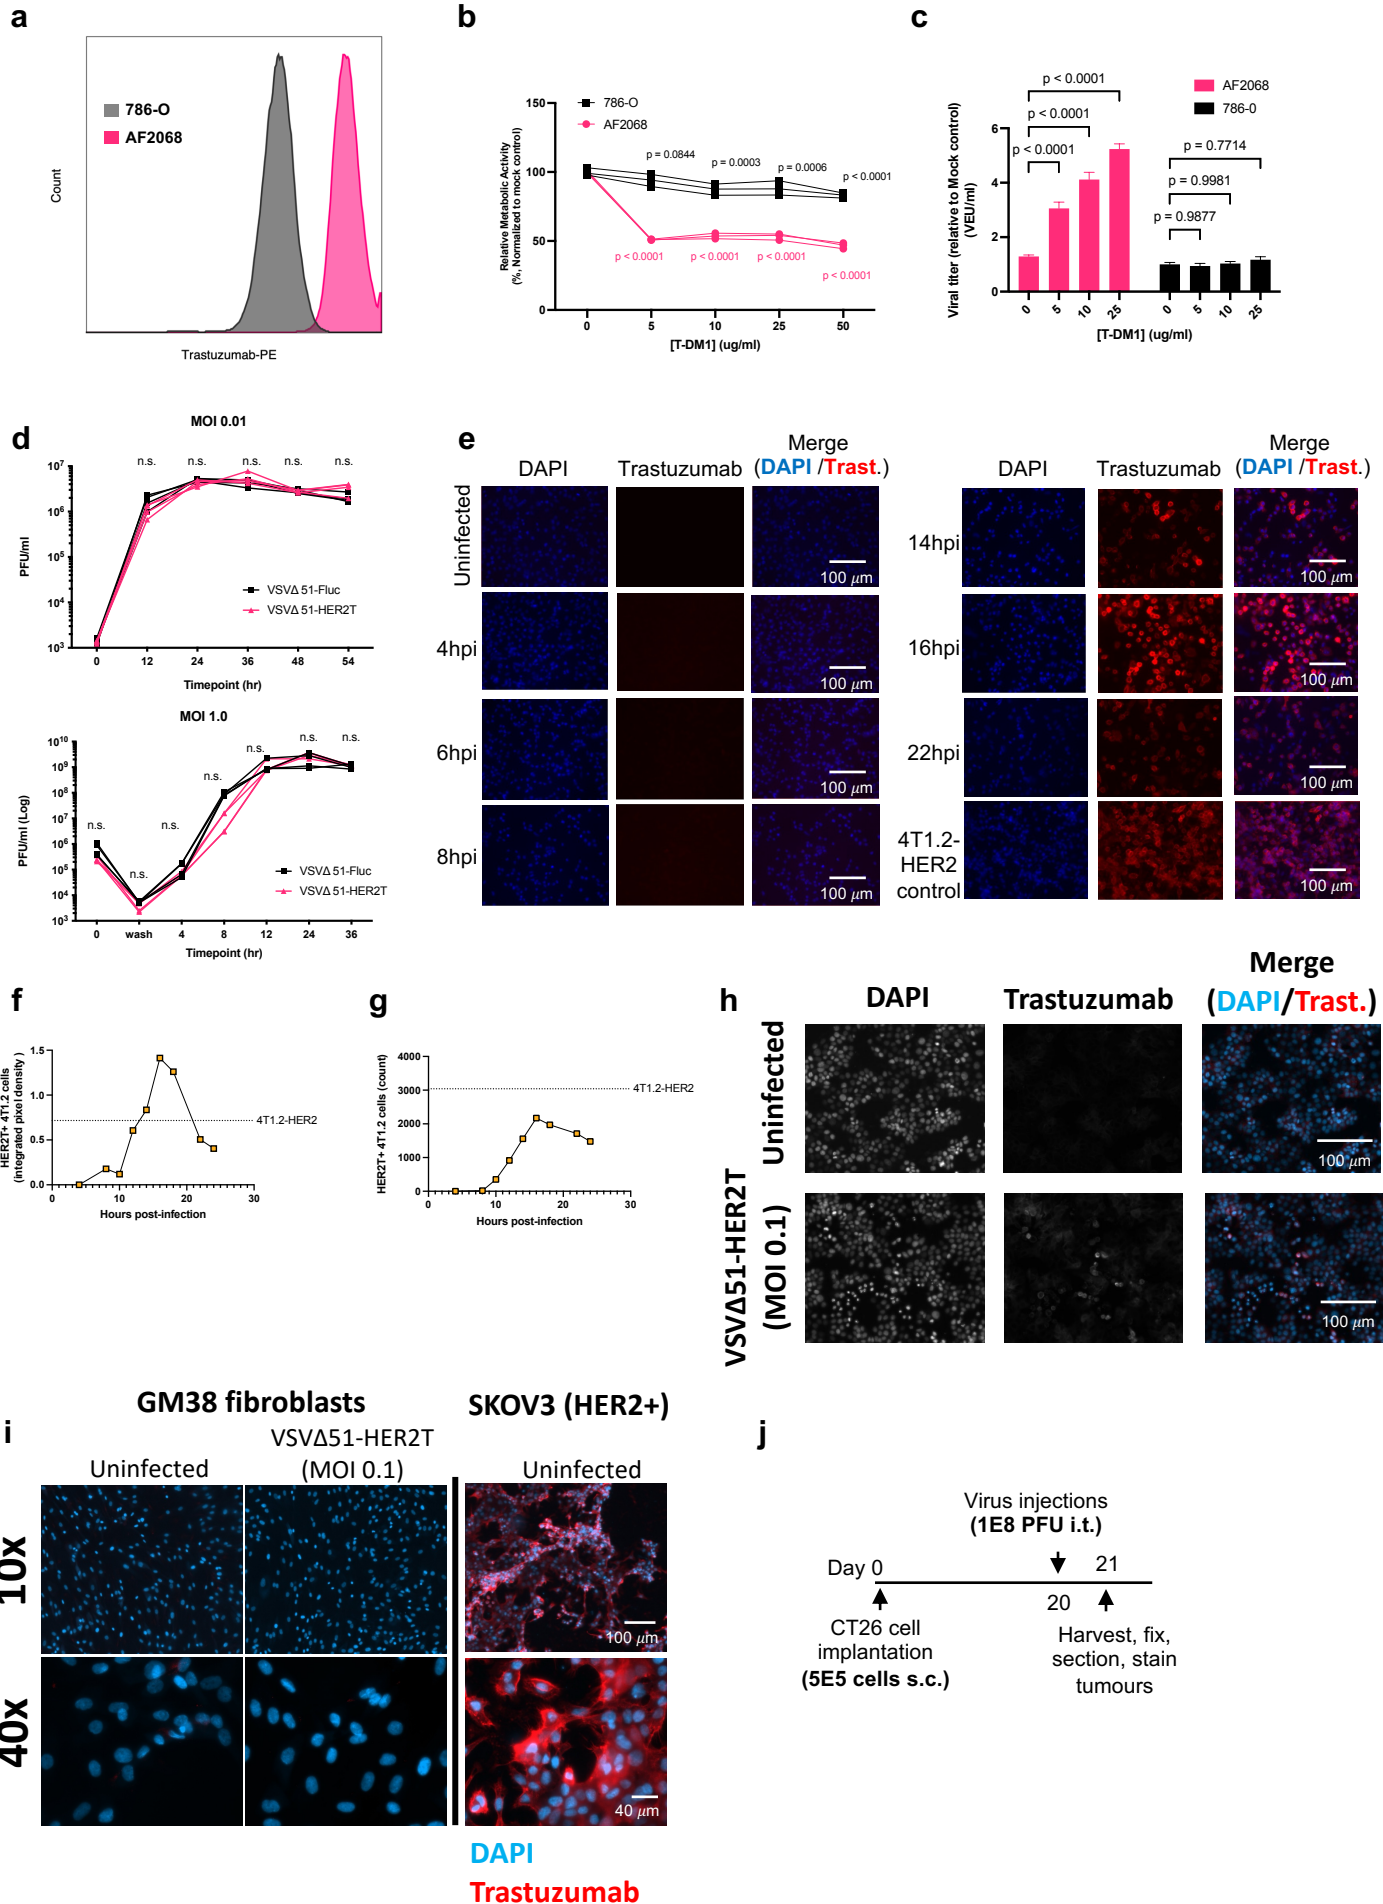

**Supplementary Fig. 1: Target-selectivity of trastuzumab and VSVΔ51-HER2T.** (a) Single-cell suspensions of 786-O and AF2068 cell lines were stained with trastuzumab as a primary antibody (1:1000) then incubated with anti-human IgG-PE secondary antibody. Data were acquired by flow cytometry to detect Trastuzumab-PE signal. (b) 786-O and AF2068 cells were treated in 24-well plates with T-DM1 at the indicated concentrations for 2 h. Supernatants were removed and cells were washed and replenished with fresh medium to remove excess unbound ADC. Cell viability was assessed by AlamarBlue, 48 h post-treatment, and normalized to untreated controls. Shown are mean  $\pm$  SEM,  $n = 3$ ,  $P$ -value calculated by one-way ANOVA relative to untreated control with Dunnett correction for multiple comparisons. (c) Cells were treated as in (b) then infected with MOI 0.001 VSVΔ51-Fluc. Viral supernatant was quantified 48 hpi by high-throughput luciferase titrating. Shown are mean  $\pm$  SEM,  $n = 3$ ,  $P$ -value calculated by one-way ANOVA relative to untreated control with Dunnett correction for multiple comparisons. (d) Overview of VSVΔ51 multi-step (top, MOI 0.01) and single-step (bottom, MOI 1.0) VSVΔ51 growth curves; 4T1.2 cells were seeded in 24-well plates at  $2 \times 10^5$  cells per well and incubated overnight. Cells were infected with VSVΔ51-HER2T or VSVΔ51-Fluc and incubated. Viral supernatant was collected at the indicated timepoints post-infection, including the wash where “w” is indicated, and viral titer was quantified by plaque assay. Shown are mean  $\pm$  SEM,  $n = 3$ ,  $P$ -value calculated by two-tailed unpaired t-test at each timepoint between both VSVΔ51 variants. (e) 4T1.2 cells were seeded on glass coverslips and infected with VSVΔ51-HER2T MOI 0.1, then incubated at 37°C uninfected 4T1.2-HER2T were stained as a control. Cells were fixed with 4% PFA at the indicated timepoints post-infection and stained then mounted and imaged at 20 $\times$  magnification. Similar results were observed in 3 independent experiments. (f) Total staining intensity was calculated using ImageJ, and (g) trastuzumab-positive cells were counted. (h) Human HT29 cells were seeded on glass coverslips, after which cells were infected with VSVΔ51-HER2T at an MOI of 0.1. Cells were fixed and stained 24 hpi using trastuzumab as a primary antibody (1:1000) and imaged using a Zeiss AxioImage.M2 microscope at 20 $\times$  magnification. Similar results were observed in 3 independent experiments, with similar HER2-low human cell lines. (i) Normal human fibroblasts GM38 cells were seeded on glass coverslips then infected with VSVΔ51-HER2T an MOI 0.1. Cells were fixed and stained 24 hpi then imaged at the indicated magnifications. SKOV3 cells were used as HER2+ controls. Similar results were observed in 2 independent experiments. (j) Balb/c ( $n = 3$ ) mice were implanted with subcutaneous bilateral CT26 tumours in the flanks. Upon reaching  $\sim 400$  mm<sup>3</sup> (day 20 post-implantation) tumours were injected with VSVΔ51-HER2T (right hand right) or VSVΔ51-GFP as a control (left hand side), at  $1 \times 10^8$  PFU. Tumours were excised 24 h post-implantation, flash frozen in O.C.T. medium, sectioned, fixed in 4% PFA, and stained. Source data are provided as a Source Data file.

# Supplementary Fig. 2

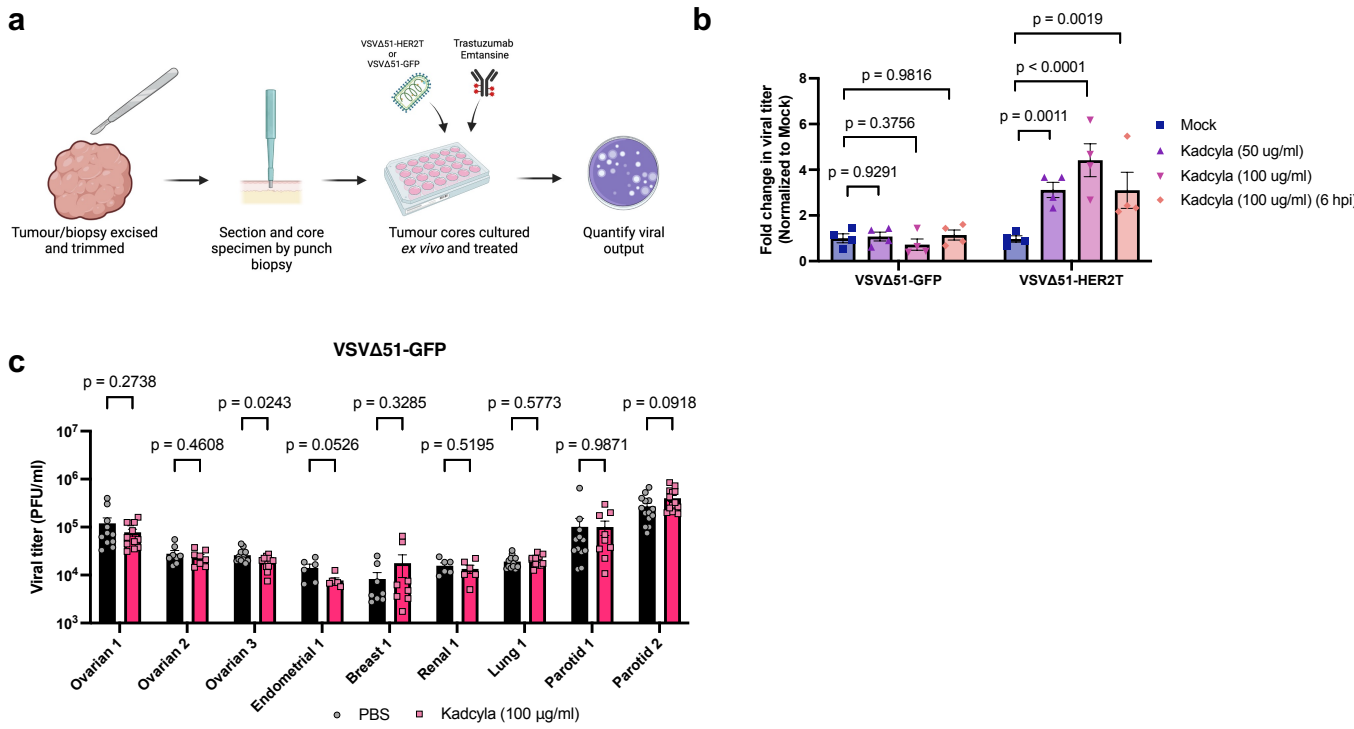

**Supplementary Fig. 2: VSVΔ51-HER2T delivers the target antigen for T-DM1 leading to enhanced viral output in *ex vivo* patient tumours.** (a) Schematic highlighting the process of generating and treating tumour cores. (b) Cores from CT26 tumours were infected and treated as indicated. 48 hpi viral titer in the core supernatants was quantified and plotted. Shown are mean  $\pm$  SEM,  $n = 4$  cores,  $P$ -value calculated by two-way ANOVA with Dunnett correction for multiple comparisons. (c) Patient tumour cores were infected with VSVΔ51-GFP and co-treated with T-DM1 or mock (PBS) as indicated. Viral titer in supernatants was quantified 48 hpi. (mean  $\pm$  SEM,  $n = 4$ -14 cores,  $P$ -value calculated by multiple unpaired two-tailed t-tests; Endometrial 1  $n = 4$ , Renal 1  $n = 6$ , Ovarian 2 and Breast 1  $n = 8$ , Parotid 2  $n = 14$ , all others  $n = 12$ ). Source data are provided as a Source Data file.

# Supplementary Fig. 3

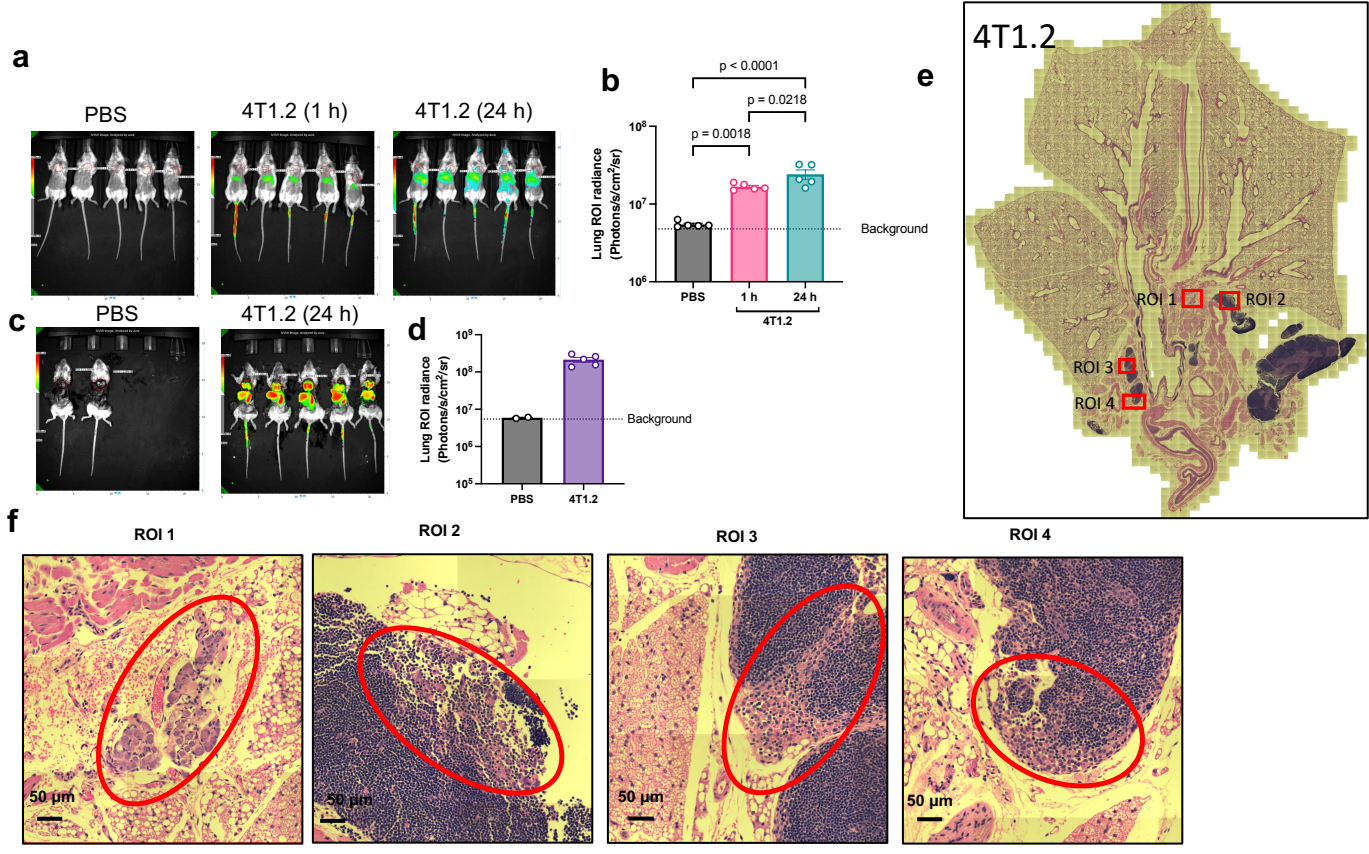

**Supplementary Fig. 3: 4T1.2 cells injected intravenously establish microscopic lesions within the lungs within 24 h.** (a) 4T1.2 cells were injected intravenously, via tail vein, into BALB/c mice. Control mice were injected with PBS. Cells were stained with an infrared dye. Mice underwent fluorescence IVIS imaging at 1 h and 24 h post-injection, at excitation 710 nm and emission 760 nm. (b) Quantification of red lung ROIs from (a) (mean  $\pm$  SEM,  $n = 5$  mice,  $p$ -value calculated by one way ANOVA with Fisher's LSD test). (c) Mice from (a) were euthanized, chest cavities were opened, and ribcages removed to expose lungs for subsequent IVIS imaging. (d) Quantification of red lung ROIs from (c) (mean  $\pm$  SEM,  $n = 2-5$  mice). (e) Lungs from (c) were perfused, fixed by formalin instillation, and processed for sectioning and H&E staining. Lung sections underwent histological evaluation by a pathologist (blinded). (f) Red ROIs (1-4) indicate representative microscopic 4T1.2 lesions. Source data are provided as a Source Data file.

# Supplementary Fig. 4

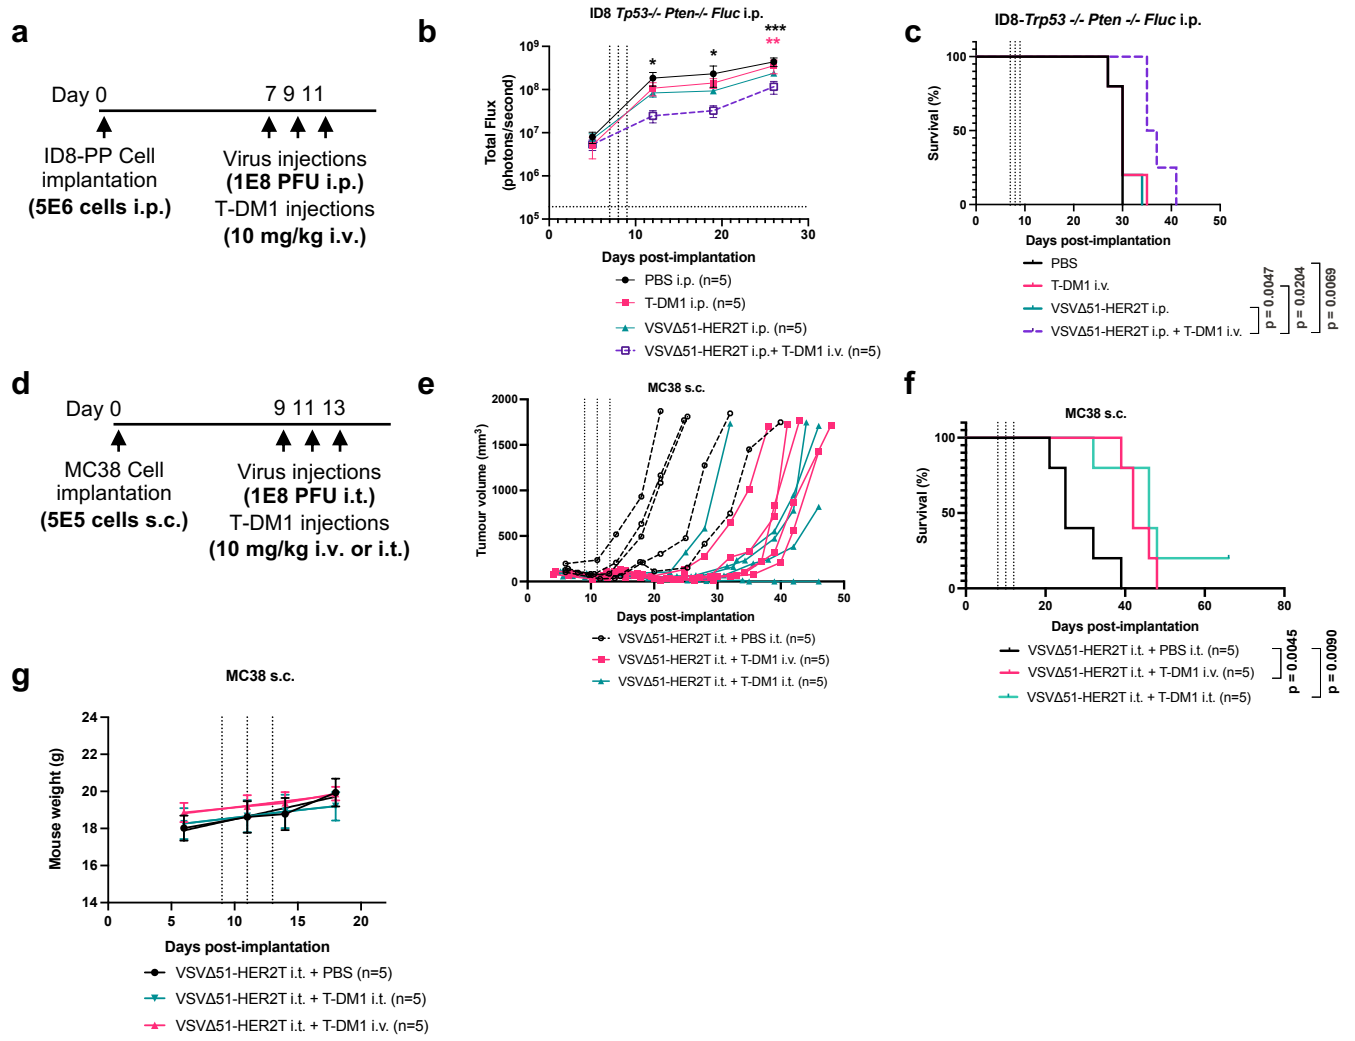

**Supplementary Fig. 4: VSVΔ51-HER2T delivers the target antigen for T-DM1 and yields combinatorial efficacy in syngeneic murine tumour models.** (a) Experimental overview:  $5 \times 10^6$  ID8 *Tp53*<sup>-/-</sup> *Pten*<sup>-/-</sup> Fluc cells were implanted i.p. into wildtype C57BL/6 mice on D0 and treated on D7, D9, and D11 as indicated. (b) Mice were treated i.p. as indicated by the dotted lines. Mice underwent 4 rounds of IVIS imaging, 1 week apart, beginning on D5. Total flux was calculated and plotted. Shown are mean  $\pm$  SEM,  $n = 5$  mice per group, \*  $P < 0.05$ , \*\*\*  $P < 0.001$ ; comparison between VSVΔ51-HER2T+T-DM1 and whichever group the asterisk colour matches, by two-way ANOVA with Fisher's LSD test. Exact  $P$ -values are provided in the Source Data file. (c) Mice from (d-e) were monitored for overall survival; (d) Experimental overview:  $5 \times 10^5$  MC38 cells were implanted s.c. into the right flanks of wildtype C57BL/6 mice on D0, and treated on D9, D11, and D13 as indicated. (e) Tumour volumes were measured by electronic calipers and (f) overall survival was monitored. (g) Mouse weights from (d) were measured (mean  $\pm$  SEM,  $n = 5$  mice). Source data are provided as a Source Data file.

# Supplementary Fig. 5

**a**

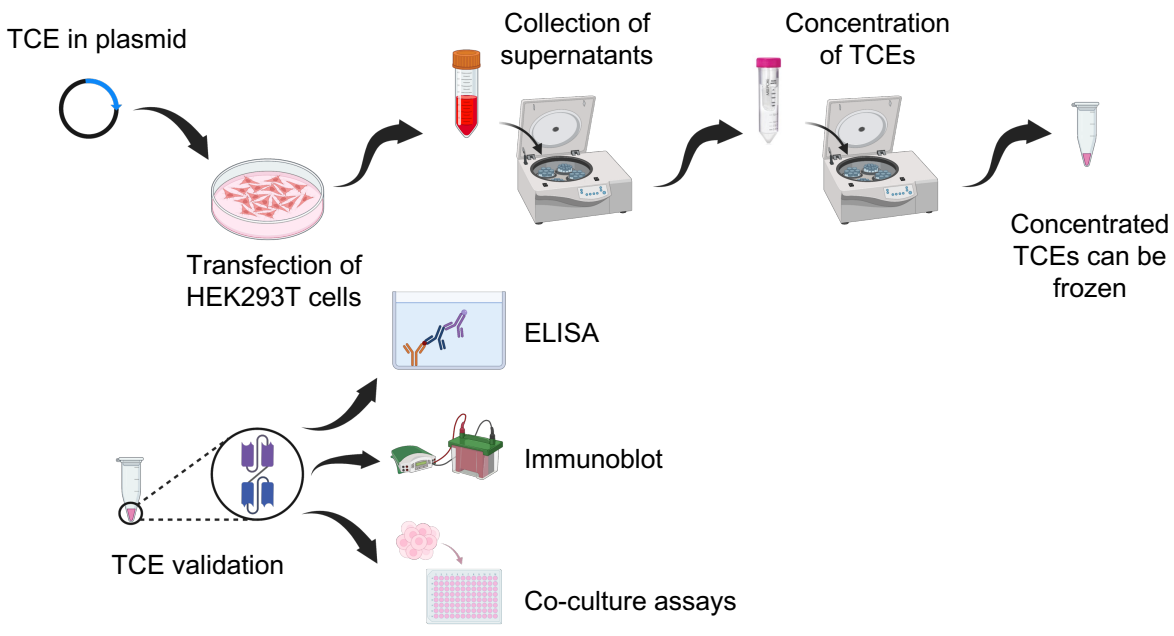

**b**

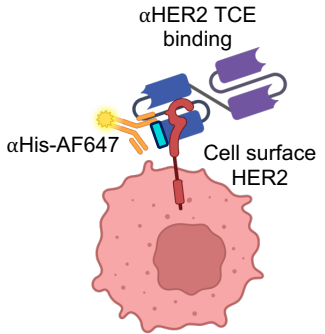

**Supplementary Fig. 5: TCE generation and binding.** (a) Schematic highlighting the generation and purification of TCEs *in vitro* (b) Overview of the TCE binding assay.

# Supplementary Fig. 6

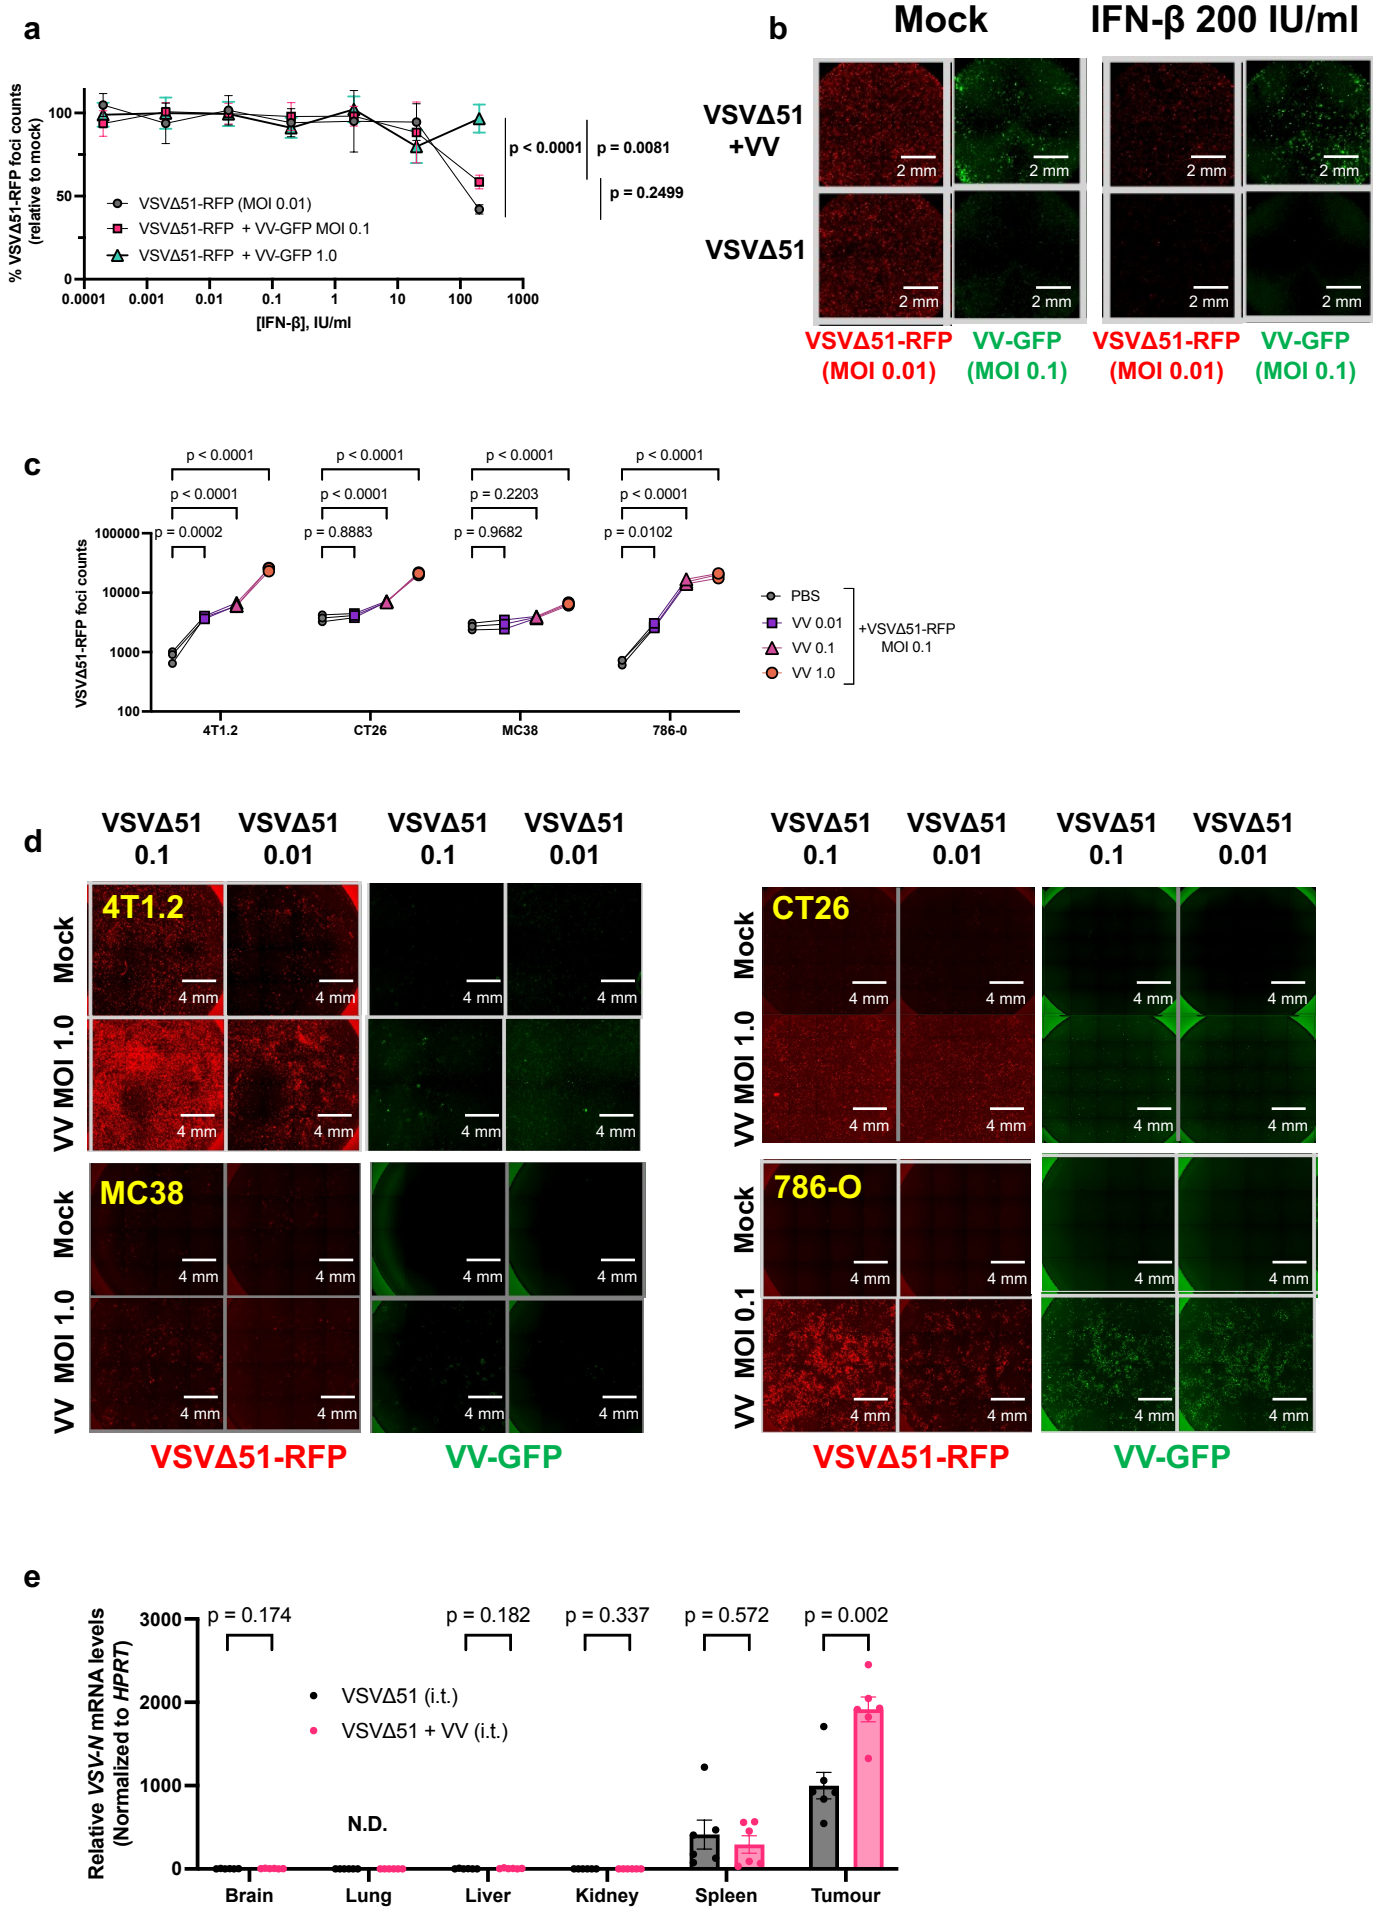

**Supplementary Fig. 6: Determining the effects of IFN $\beta$  and VV on VSV $\Delta$ 51 infection.** (a) Vero cells seeded in 96-well plates at  $2.5 \times 10^4$  cells per well, and were infected with VSV $\Delta$ 51-RFP at an MOI of  $0.01 \pm$  co-infection with VV-GFP at the indicated MOI. IFN $\beta$  was added 2 hpi. RFP and GFP counts were quantified 48 hpi using the Cellomics ArrayScan. Shown are mean  $\pm$  SEM,  $n = 3$ ,  $P$ -value calculation by one-way ANOVA with Tukey's correction for multiple comparisons. (b) RFP (VSV $\Delta$ 51 foci) and GFP (VV foci) images from (a), at 0 and 200 IU/ml IFN $\beta$ , imaged at  $2.5\times$  magnification. (c) The indicated cell lines were seeded in 24-well plates and infected with VSV $\Delta$ 51-RFP at the indicated MOI  $\pm$  co-infection with VV-GFP at the indicated MOI. RFP foci counts were quantified 48 hpi as in (a). Shown are mean  $\pm$  SEM,  $n = 3$ ,  $P$ -value calculated by two-way ANOVA relative to Mock (PBS), with Dunnett correction for multiple comparisons. (d) RFP (VSV $\Delta$ 51 foci) and GFP (VV foci) images from, imaged at  $2.5\times$  magnification. (e) BALB/c mice bearing CT26 tumours were injected i.t. with the indicated viruses ( $1 \times 10^8$  PFU VSV $\Delta$ 51;  $1 \times 10^7$  PFU VV). Mice were euthanized 48 hpi; tumours and organs were harvested and snap frozen. *VSV-N* mRNA expression was measured in different organs to assess the biodistribution of VSV $\Delta$ 51 by qRT-PCR. Shown are mean  $\pm$  SEM,  $n = 3$  mice per group,  $P$ -value calculated by Student's t-test. (N.D. not detected) Source data are provided as a Source Data file.



# Supplementary Fig. 7

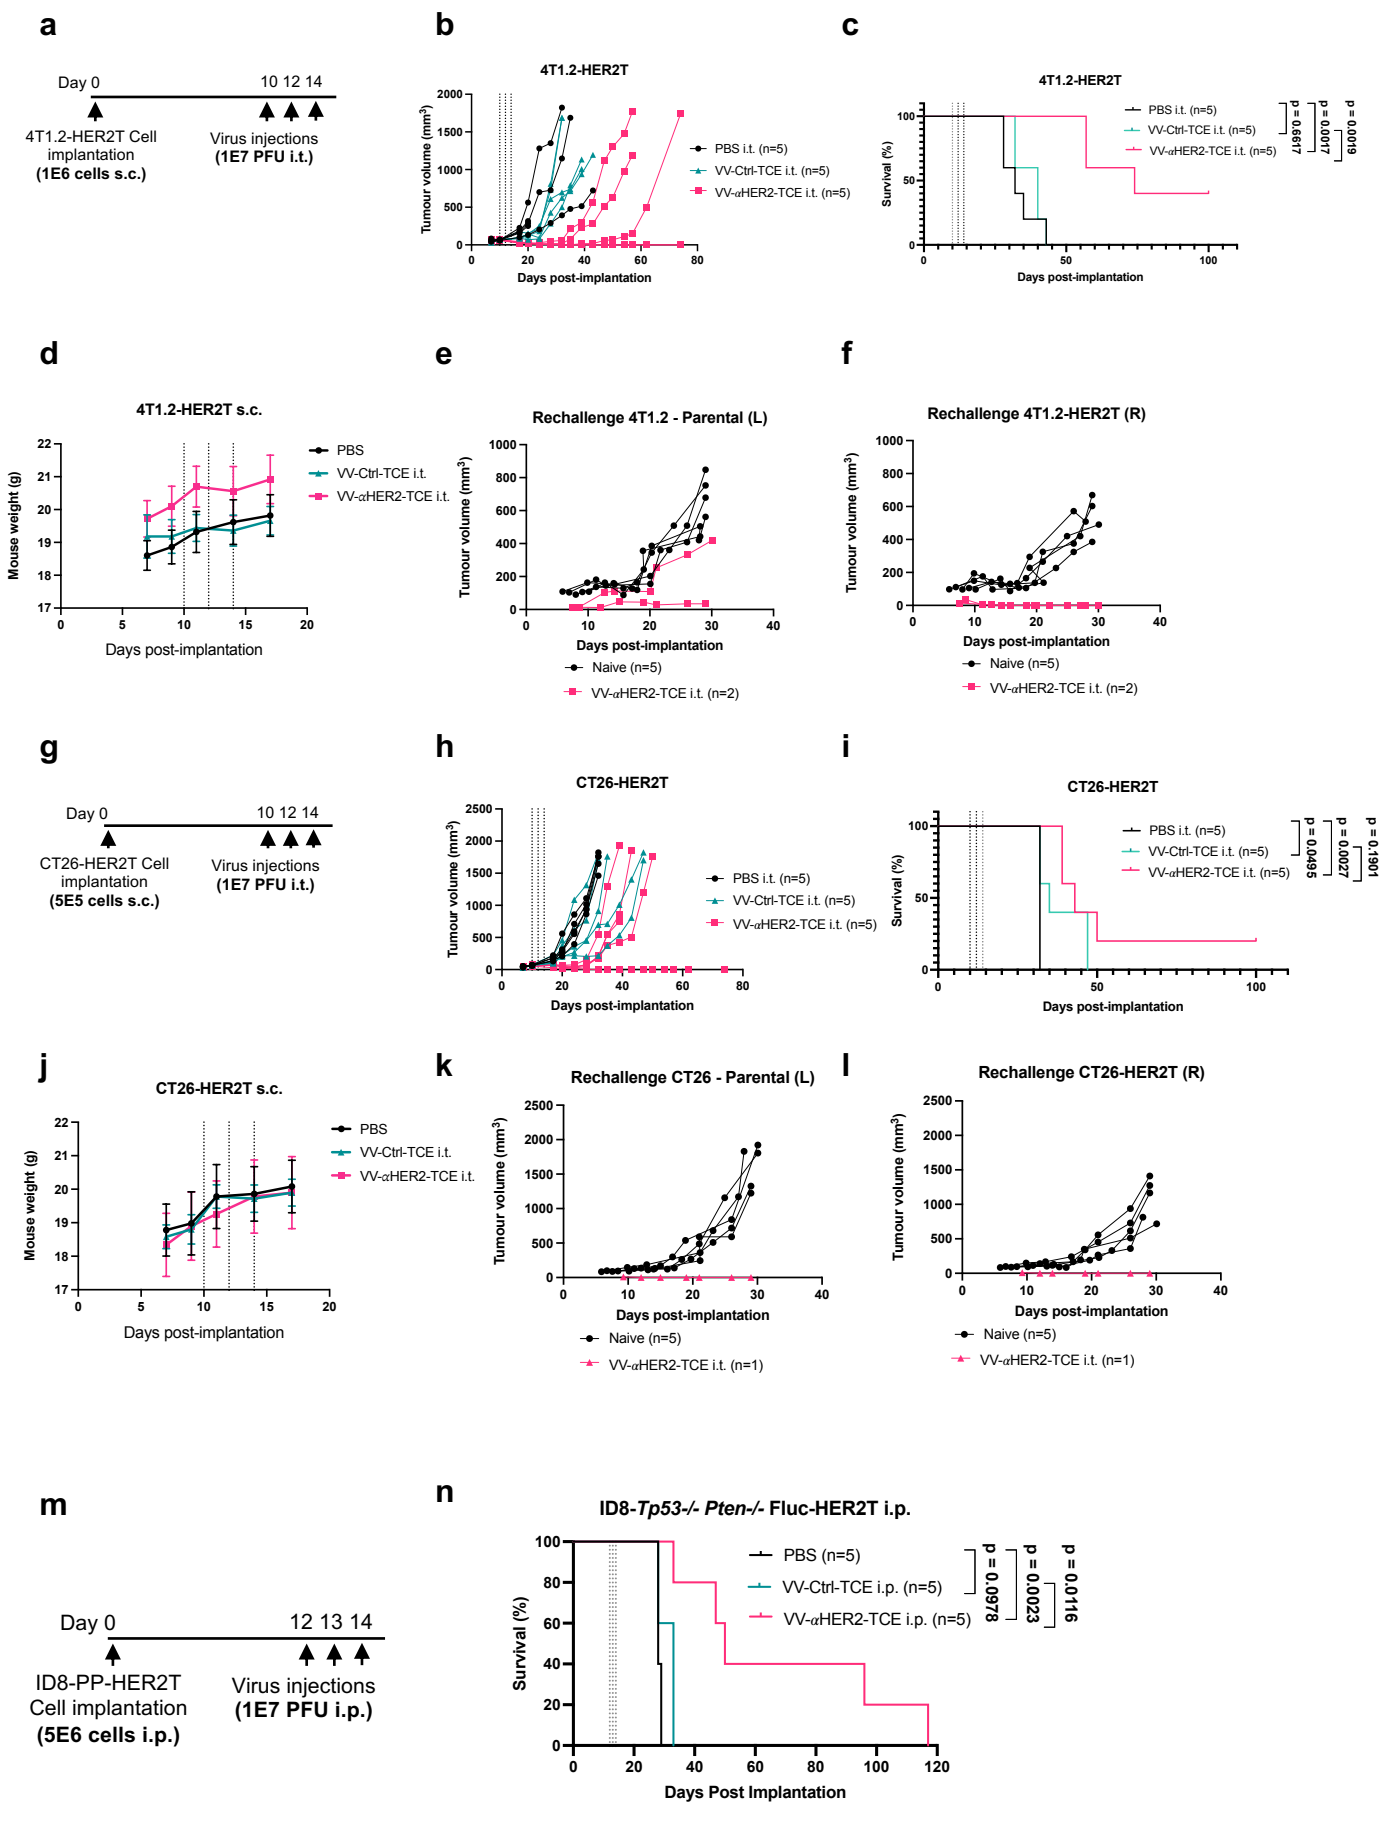

**Supplementary Fig. 7: Treatment of syngeneic murine HER2T+ tumour models with VV- $\alpha$ HER2-TCE leads to efficacy.** (a) Experimental overview:  $1 \times 10^6$  4T1.2-HER2T cells were implanted s.c. in the right flank in BALB/c mice, followed by i.t. treatments as indicated. (b) Tumour volumes from (a) were monitored (mean  $\pm$  SEM,  $n = 5$  mice per group). (c) Overall survival from (a) was monitored. (d) Mouse weights from (a). (e-f) Cured mice from (a-c) were re-challenged with bilateral s.c. tumours, (e) parental 4T1.2 or (f) 4T1.2-HER2T as indicated. Naïve mice were challenged with bilateral s.c. tumours as indicated, and tumour volumes were monitored. (g) Experimental overview:  $5 \times 10^5$  CT26-HER2T cells were implanted s.c. in the right flank in BALB/c mice, followed by i.t. treatments as indicated (h) Tumour volumes from (f) were monitored (mean  $\pm$  SEM,  $n = 5$  mice per group). (i) Overall survival from (g) was monitored. (j) Mouse weights from (g). (k-l) Cured mice from (g-i) were re-challenged with bilateral s.c. tumours, (k) parental CT26 or (l) CT26-HER2T as indicated. Naïve mice were challenged with bilateral s.c. tumours as indicated, and tumour volumes were monitored. (m) Experimental overview:  $5 \times 10^6$  ID8-PP-HER2T cells were implanted i.p. in C57BL/6 mice, followed by i.p. treatments as indicated. (n) Overall survival from (k) was monitored. Source data are provided as a Source Data file.

# Supplementary Fig. 8

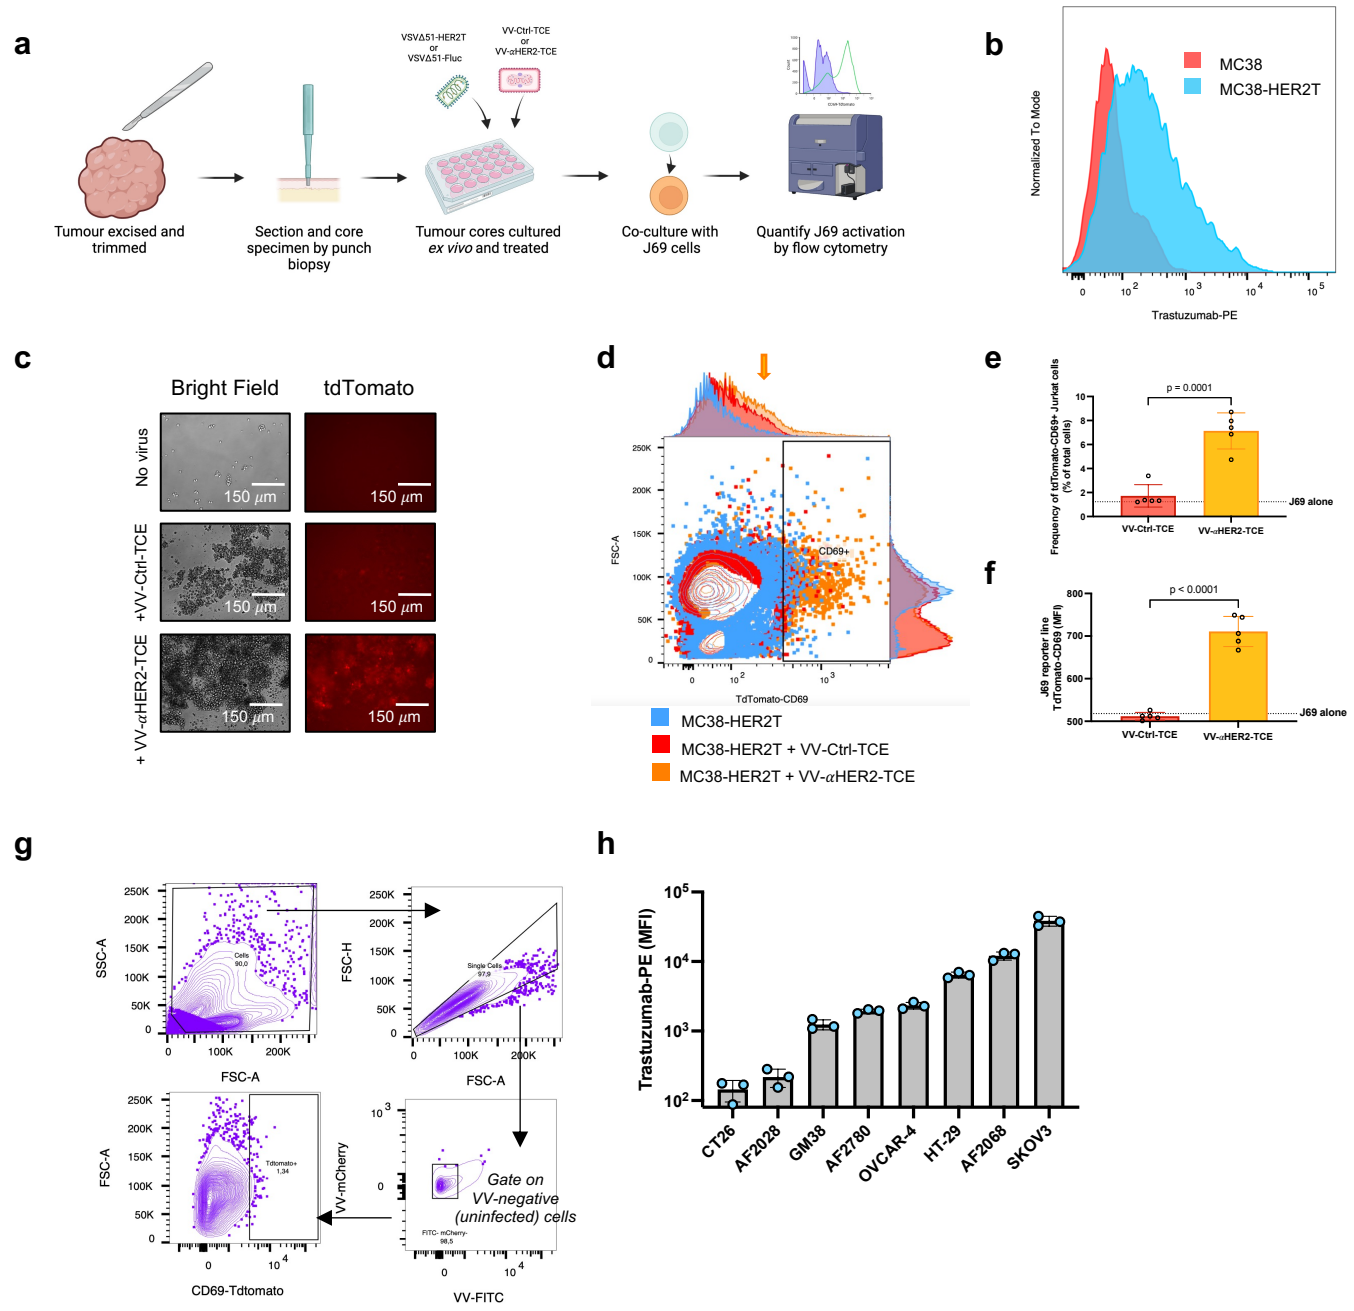

**Supplementary Fig. 8: Validation of tumour core, co-culture assays, and flow cytometry.** (a) Schematic highlighting the process of acquiring, processing, and analyzing tumour core specimens. (b) MC38 and MC38-HER2T cells were analyzed by flow cytometry for trastuzumab-PE binding. (c) MC38-HER2T tumour cores were co-cultured with J69 cells *ex vivo* followed treatment as indicated. Images of J69 cells were acquired using a EVOS M5000 microscope (10× magnification). (d) J69 cells from (c) were isolated, and TdTomato signal was quantified by flow cytometric analysis. The orange arrow indicates the shift in TdTomato signal followed treatment with VV-αHER2-TCE. (e) Frequency of TdTomato J69 cells and (f) MFI of TdTomato + J69 cells were quantified. Shown are mean ± SEM,  $n = 5$  cores per group;  $P$ -value was calculated by unpaired two-tailed t-test. (g) Gating strategy for identification of TdTomato + J69 cells in (d-f). (h) Quantification of cell surface HER2 by flow cytometric analysis, using trastuzumab (1:1000) as a primary antibody. Shown are mean ± SEM,  $n = 3$  biological replicates per cell line. Source data are provided as a Source Data file.

# Supplementary Fig. 9

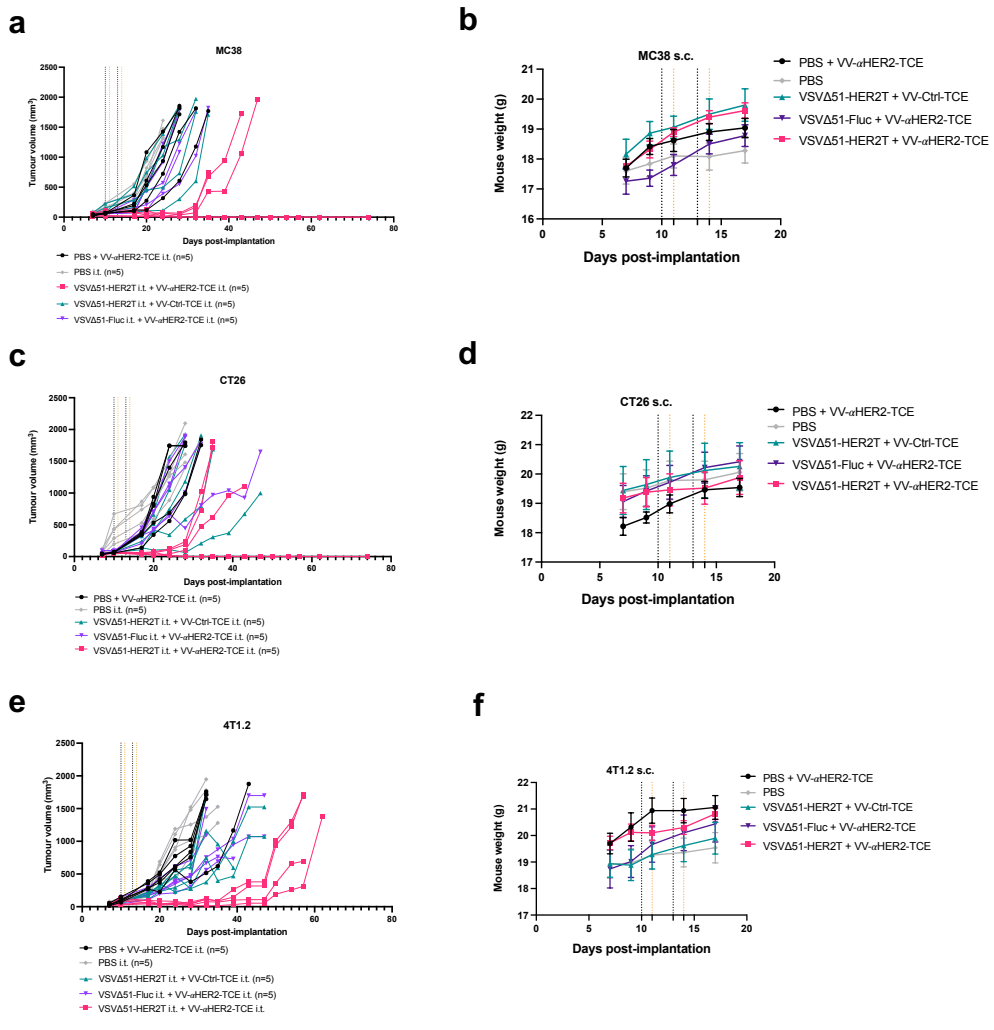

**Supplementary Fig. 9: *In vivo* study designs and tumour volumes.** (a) MC38 s.c. tumour volumes were measured and plotted for individual mice. Treatments are indicated by the dotted lines. (b) Mouse weights from (a) were monitored. Shown are mean  $\pm$  SEM,  $n = 5$  per group. (c) CT26 s.c. tumour volumes were measured and plotted for individual mice. Treatments are indicated by the dotted lines. (d) Mouse weights from (c) were monitored. Shown are mean  $\pm$  SEM,  $n = 5$  per group. (e) 4T1.2 s.c. tumour volumes were measured and plotted for individual mice. Treatments are indicated by the dotted lines. (f) Mouse weights from (e) were monitored. (mean  $\pm$  SEM,  $n = 5$  per group). Source data are provided as a Source Data file.

# Supplementary Fig. 10

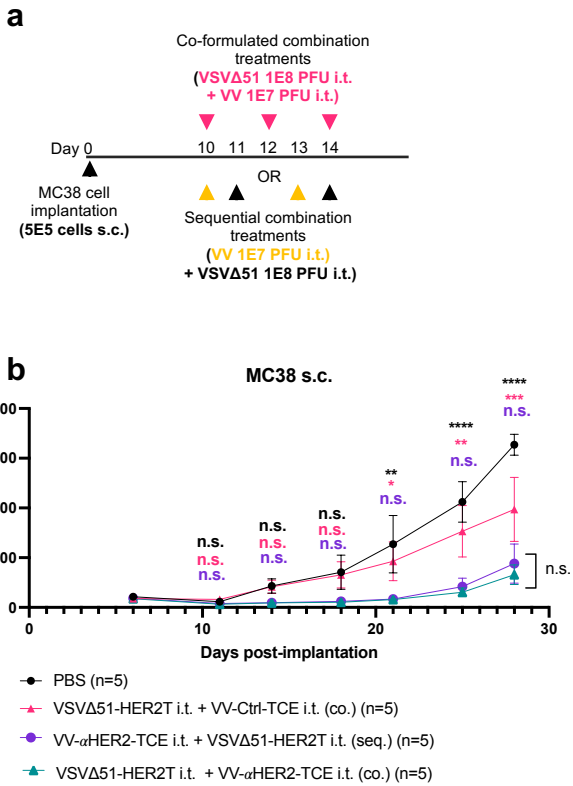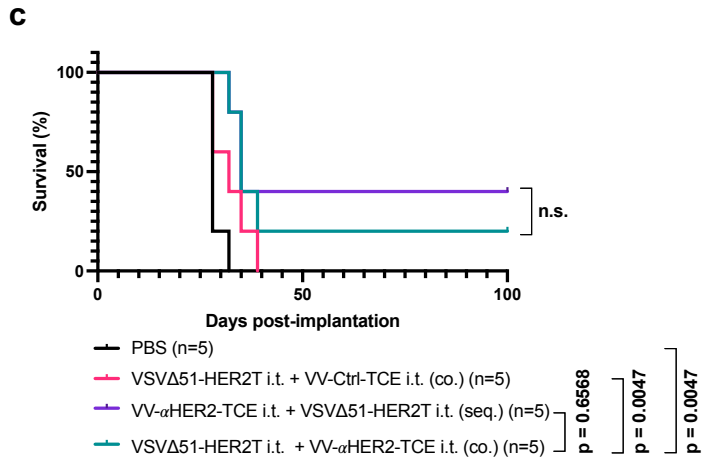

**d**

| Day 6                                        |    |        |
|----------------------------------------------|----|--------|
| PBS                                          | ns | 0.9153 |
| VSVΔ51-HER2T i.t. + VV-Ctrl-TCE i.t. (co.)   | ns | 0.9926 |
| VSVΔ51-HER2T i.t. + VV-αHER2-TCE i.t. (seq.) | ns | 0.9835 |

  

| Day 11                                       |    |        |
|----------------------------------------------|----|--------|
| PBS                                          | ns | 0.8868 |
| VSVΔ51-HER2T i.t. + VV-Ctrl-TCE i.t. (co.)   | ns | 0.7864 |
| VSVΔ51-HER2T i.t. + VV-αHER2-TCE i.t. (seq.) | ns | 0.9696 |

  

| Day 14                                       |    |        |
|----------------------------------------------|----|--------|
| PBS                                          | ns | 0.3519 |
| VSVΔ51-HER2T i.t. + VV-Ctrl-TCE i.t. (co.)   | ns | 0.3765 |
| VSVΔ51-HER2T i.t. + VV-αHER2-TCE i.t. (seq.) | ns | 0.9978 |

  

| Day 18                                       |    |        |
|----------------------------------------------|----|--------|
| PBS                                          | ns | 0.099  |
| VSVΔ51-HER2T i.t. + VV-Ctrl-TCE i.t. (co.)   | ns | 0.1333 |
| VSVΔ51-HER2T i.t. + VV-αHER2-TCE i.t. (seq.) | ns | 0.9645 |

  

| Day 21                                       |    |        |
|----------------------------------------------|----|--------|
| PBS                                          | ** | 0.0027 |
| VSVΔ51-HER2T i.t. + VV-Ctrl-TCE i.t. (co.)   | *  | 0.0366 |
| VSVΔ51-HER2T i.t. + VV-αHER2-TCE i.t. (seq.) | ns | 0.9784 |

  

| Day 25                                       |      |         |
|----------------------------------------------|------|---------|
| PBS                                          | **** | <0.0001 |
| VSVΔ51-HER2T i.t. + VV-Ctrl-TCE i.t. (co.)   | **   | 0.001   |
| VSVΔ51-HER2T i.t. + VV-αHER2-TCE i.t. (seq.) | ns   | 0.7565  |

  

| Day 28                                       |      |         |
|----------------------------------------------|------|---------|
| PBS                                          | **** | <0.0001 |
| VSVΔ51-HER2T i.t. + VV-Ctrl-TCE i.t. (co.)   | ***  | 0.0004  |
| VSVΔ51-HER2T i.t. + VV-αHER2-TCE i.t. (seq.) | ns   | 0.5402  |

**Supplementary Fig. 10: Validation of the co-formulated virus co-injections *in vivo*.** (a)

Experimental overview:  $5 \times 10^5$  MC38 cells were implanted s.c. in the right flank of C57BL/6 mice. Mice were treated as indicated with the dual-virus combination; pink arrows indicate treatment with the co-formulated single-injection of both viruses. Orange and black arrows indicate sequential treatment with each virus. (b) Tumour volumes (mean  $\pm$  SEM,  $n = 5$  per group;  $p$ -values calculated by two-way ANOVA relative to the co-injection group with Fisher's LSD test; colour of the asterisks match the colour of the treatment group being compared) and (c) overall survival were monitored. (d)  $P$ -values were calculated by two-way ANOVA using tumour volume data from (b), all compared to VSV $\Delta$ 51-HER2T i.t. + VV- $\alpha$ HER2-TCE i.t. co-formulated injection (teal curve). Source data are provided as a Source Data file.

# Supplementary Fig. 11

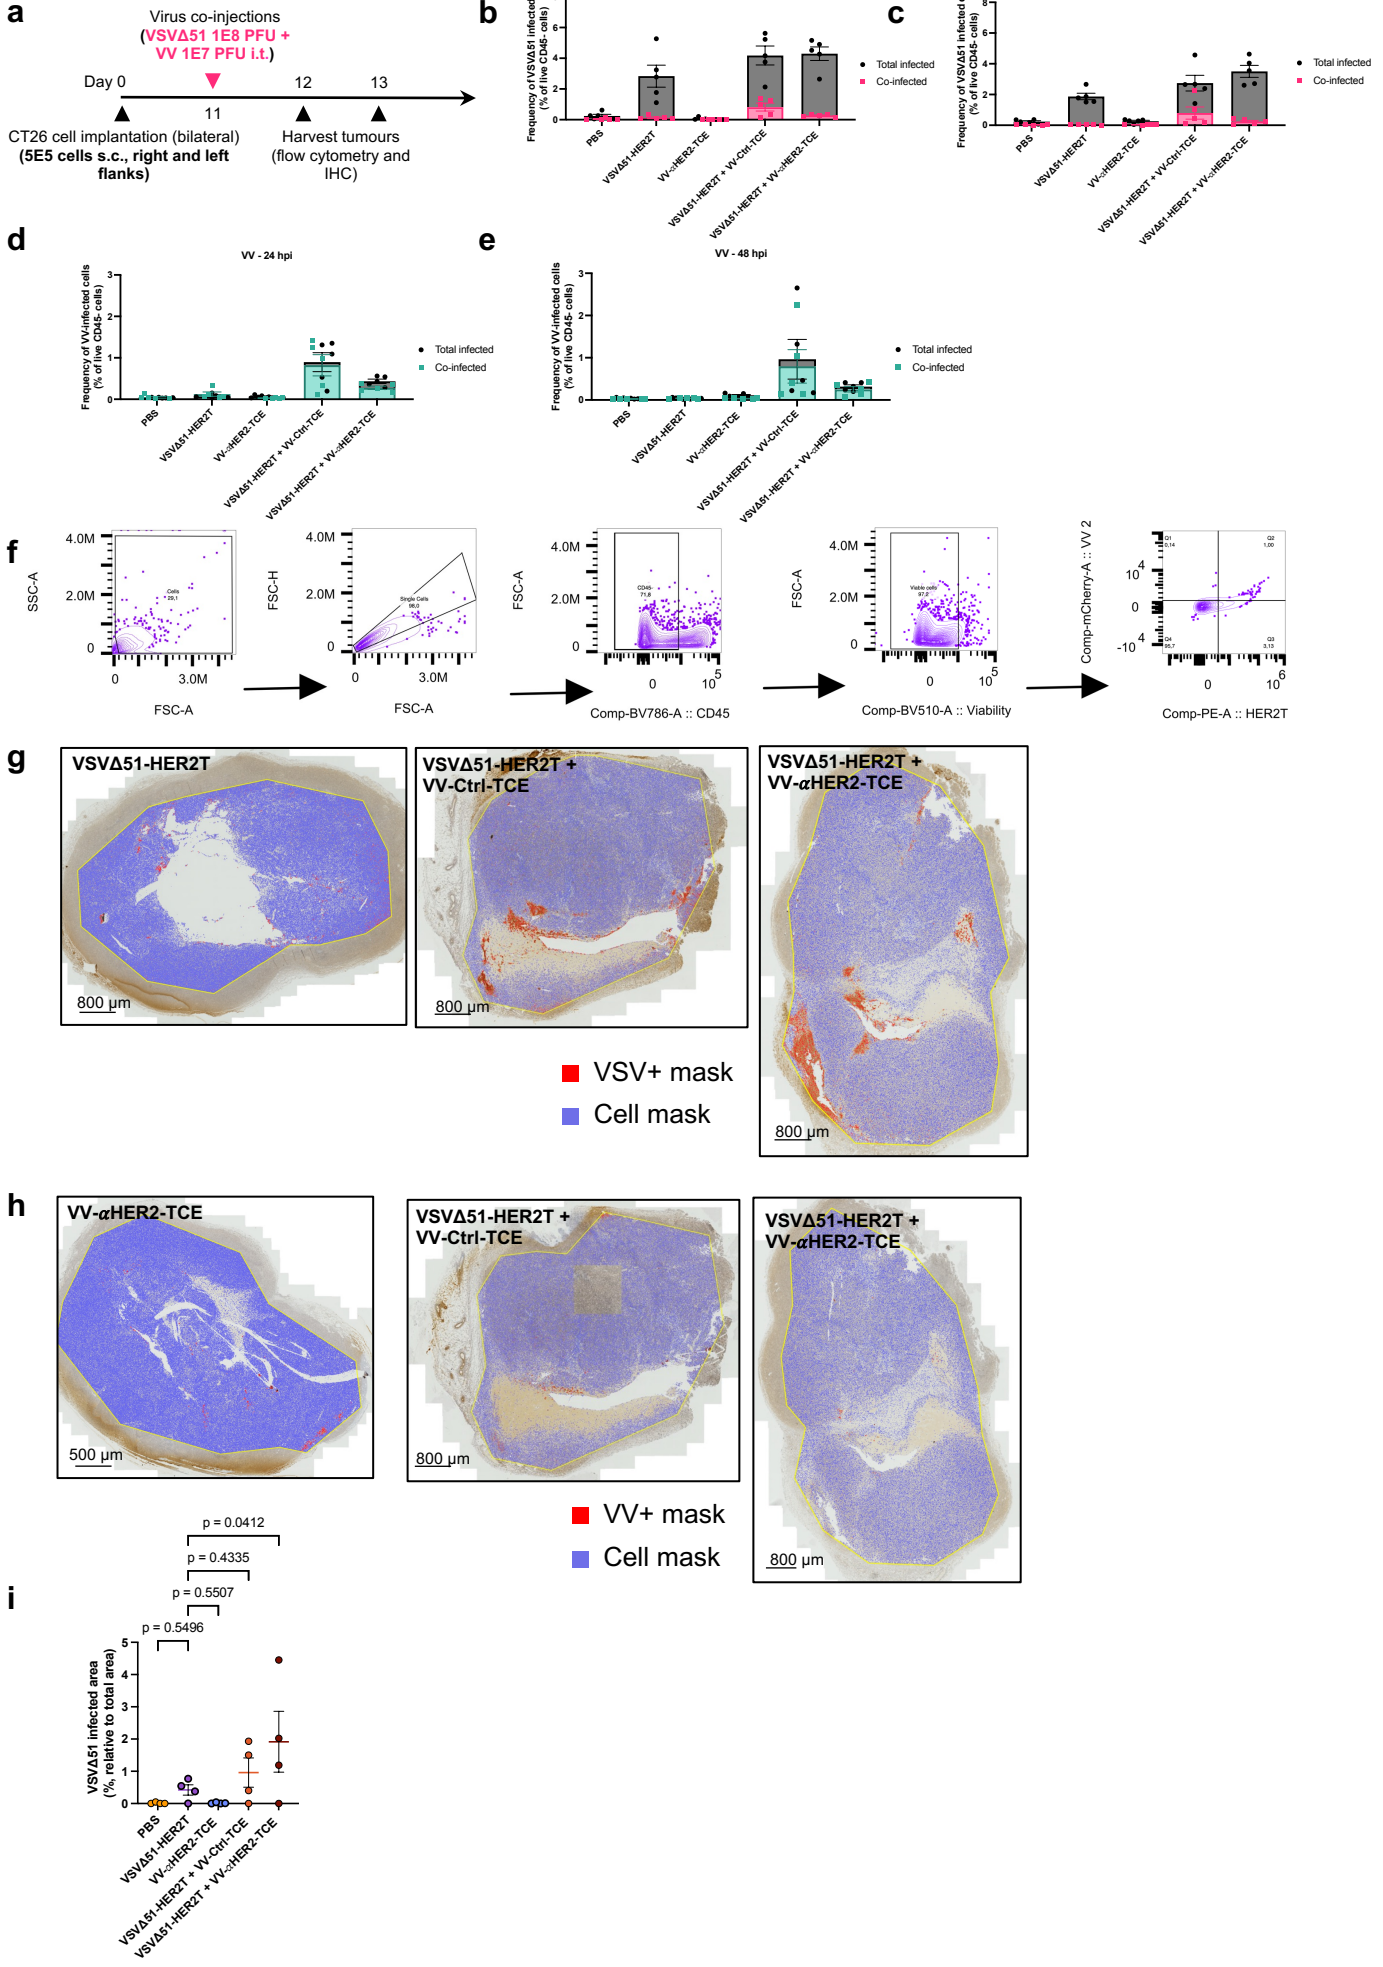

**Supplementary Fig. 11: Assessment of CT26 tumour infection at 24 and 48 h post-injection.** (a) Experimental overview:  $5 \times 10^5$  CT26 cells were implanted bilaterally in BALB/c mice subcutaneously. 11 days post-implantation, both tumours were injected with the indicated treatments ( $n=10$  mice per group). Half of the animals were harvested 24 h post-injection ( $n=5$ ), and the remaining animals were harvested at the 48 h post-injection timepoint. All tumours from the right flank were dissociated for flow cytometry analysis, while all tumours from the left flank were fixed in formalin and used in subsequent IHC. Following harvest, tumours were dissociated and analyzed by flow cytometry to detect VSV $\Delta$ 51-infected at (b) 24 and (c) 48 h post-injection. Dissociated tumours were also analyzed for VV-infected cells at (d) 24 and (e) 48 h post-injection. (f) Gating strategy for analysis of infected cells in (b-e). (g-i) Following processing, sectioning, and staining of serial tumour sections with (g) anti-VSV antibody or (h) anti-VV antibody, slides were scanned and analyzed. Mask overlays indicate areas of infected cells (red), and counterstained non-infected cells (blue). Representative images shown. Quantification of DAB-positive (infected) area shown for (i) VSV $\Delta$ 51. (mean  $\pm$  SEM,  $n = 4$  mice per group,  $P$ -value calculated by one-way ANOVA with Fisher's LSD test). Source data are provided as a Source Data file.



# Supplementary Fig. 12

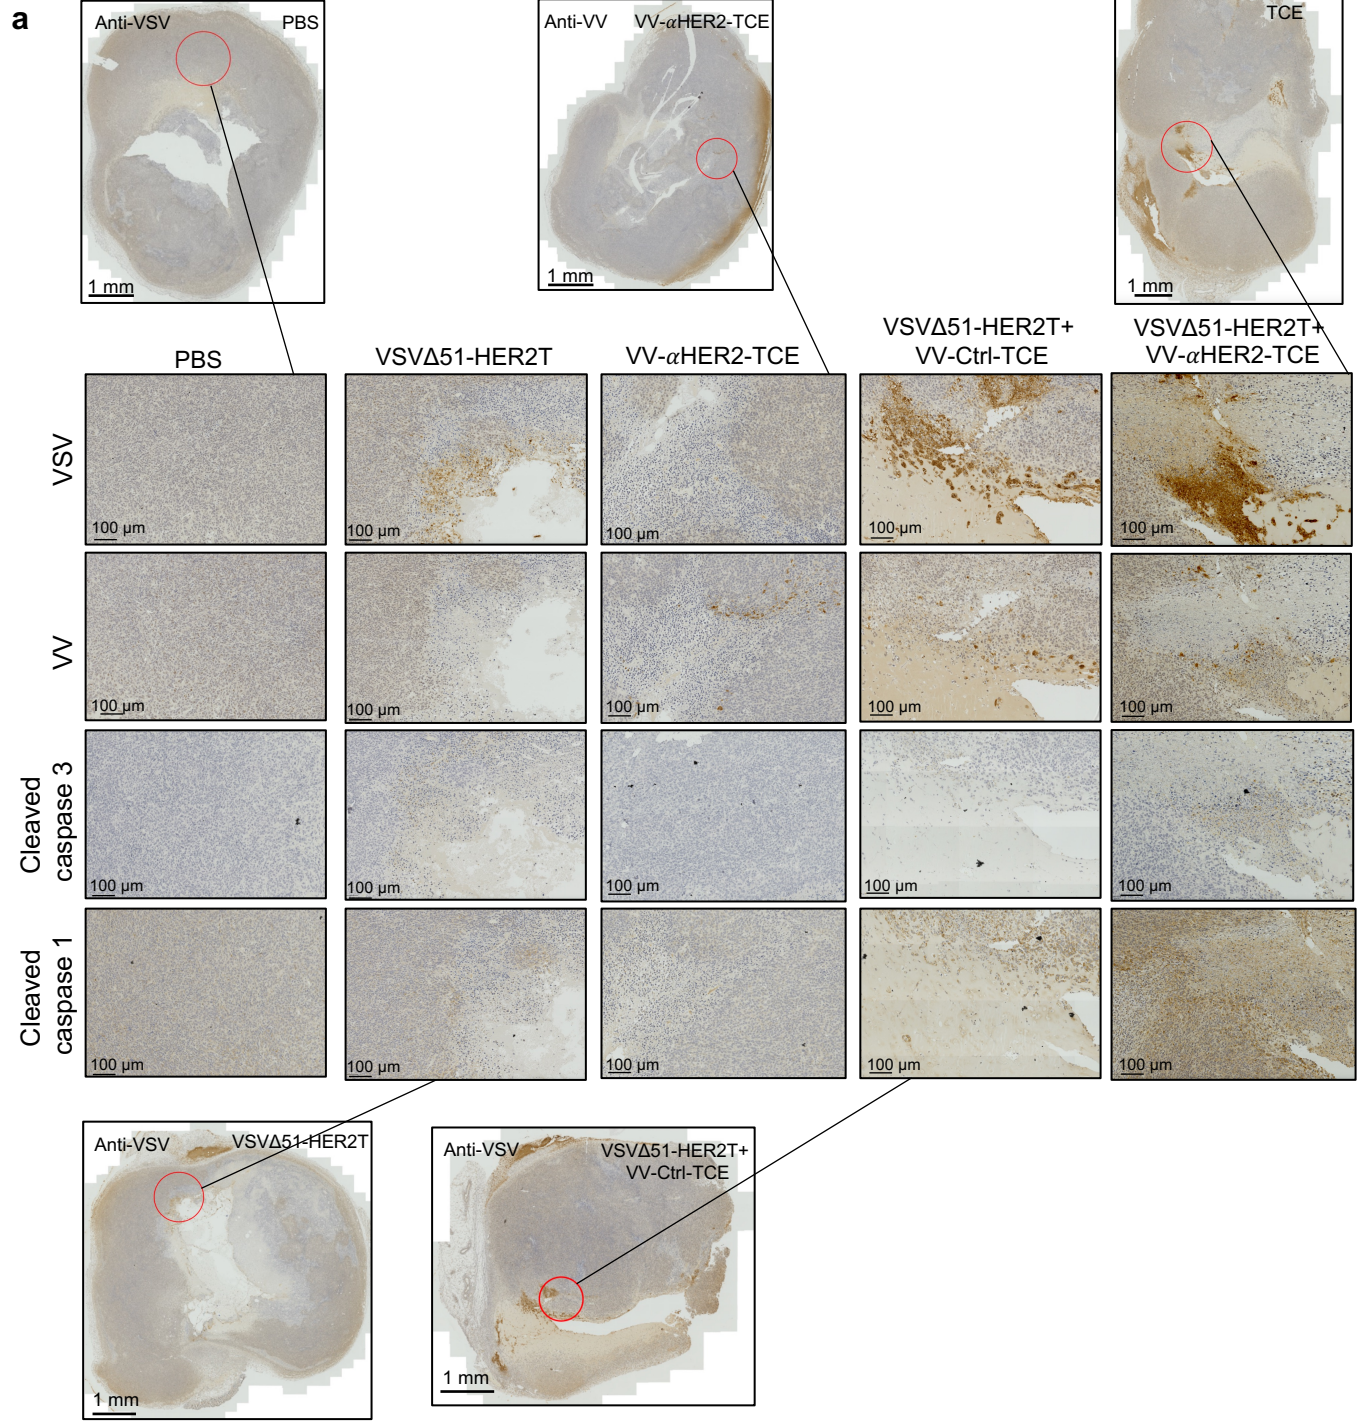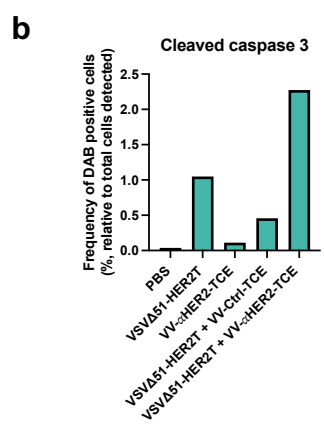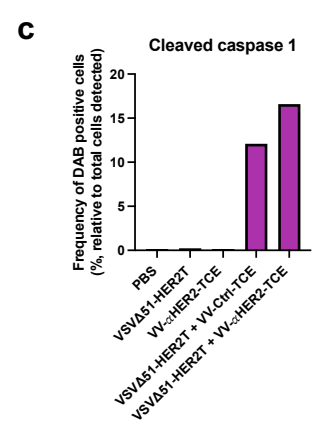

**Supplementary Fig. 12: Injection of CT26 tumours with VSV $\Delta$ 51-HER2T+ VV- $\alpha$ HER2-TCE triggers cell death in highly infected regions.** Mice ( $n = 4$  per group) bearing subcutaneous CT26 tumours were given a single intratumoural injection of the indicated treatments (from Supplementary Fig. 11). Tumours collected 48 h post-injection were fixed, paraffin embedded, and sectioned. Serial tumour sections were stained with the indicated antibodies and scanned. (a) Representative images from different tumour sections, stained with each of 4 different antibodies, are shown with close-up images of specific regions of interest (ROI) indicated by red circles ( $\sim 1.5$  mm<sup>2</sup>, 10,000+ detected cells per ROI per sample). These ROI were analyzed for the frequency of (b) cleaved-caspase 3 positive cells and (c) cleaved caspase 1 positive cells. Source data are provided as a Source Data file.

# Supplementary Fig. 13

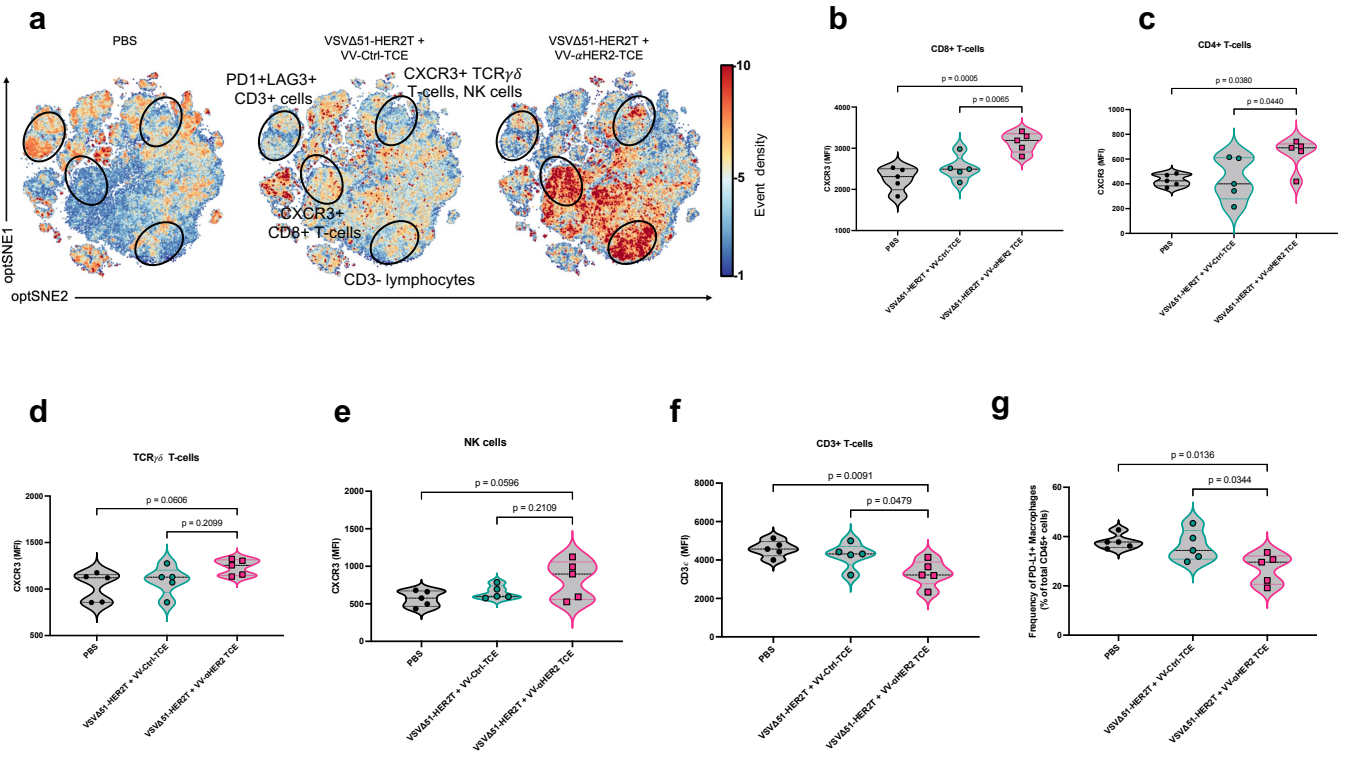

**Supplementary Fig. 13: Intratumoural injection of VSVΔ51-HER2T + VV-αHER2-TCE enhances tumour-infiltrating lymphocyte activation.** (a) Experimental overview:  $5 \times 10^5$  CT26 cells were implanted s.c. in BALB/c mice in the right flank. Mice were treated i.t. as indicated. Tumours harvested and dissociated at day 5 were analyzed by flow cytometric analysis; data was subject to processing and dimensionality reduction using the optSNE algorithm; the clustering of each treatment group is displayed. Blue indicates rare events, while red indicates more frequent events as defined by the colour bar legend. (b-e) Levels of CXCR3 (MFI) were analyzed by flow cytometry in (b) CD8+ T-cells, (c) CD4+ T-cells, (d) TCRγδ T-cells, (e) and NK cells. (f) Quantification of CD3 levels (MFI). (g) Frequency of PD-L1+ macrophages relative to total CD45+ cells. (For all violin plots, mean  $\pm$  SEM,  $n = 5$  mice per group;  $P$ -value calculated by one-way ANOVA relative to VV-αHER2-TCE + VSVΔ51-HER2T, with Dunnett correction for multiple comparison.) Source data are provided as a Source Data file.

# Supplementary Fig. 14

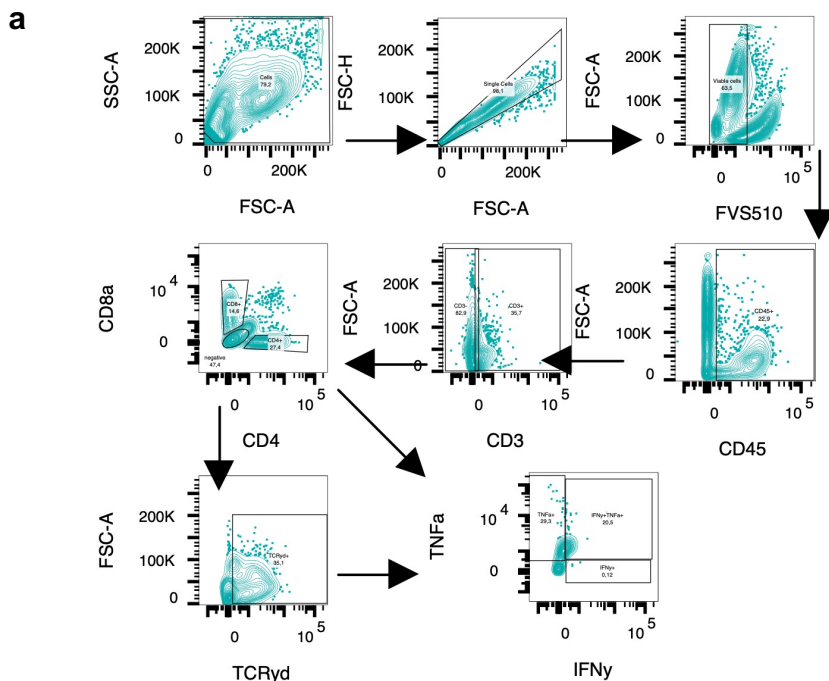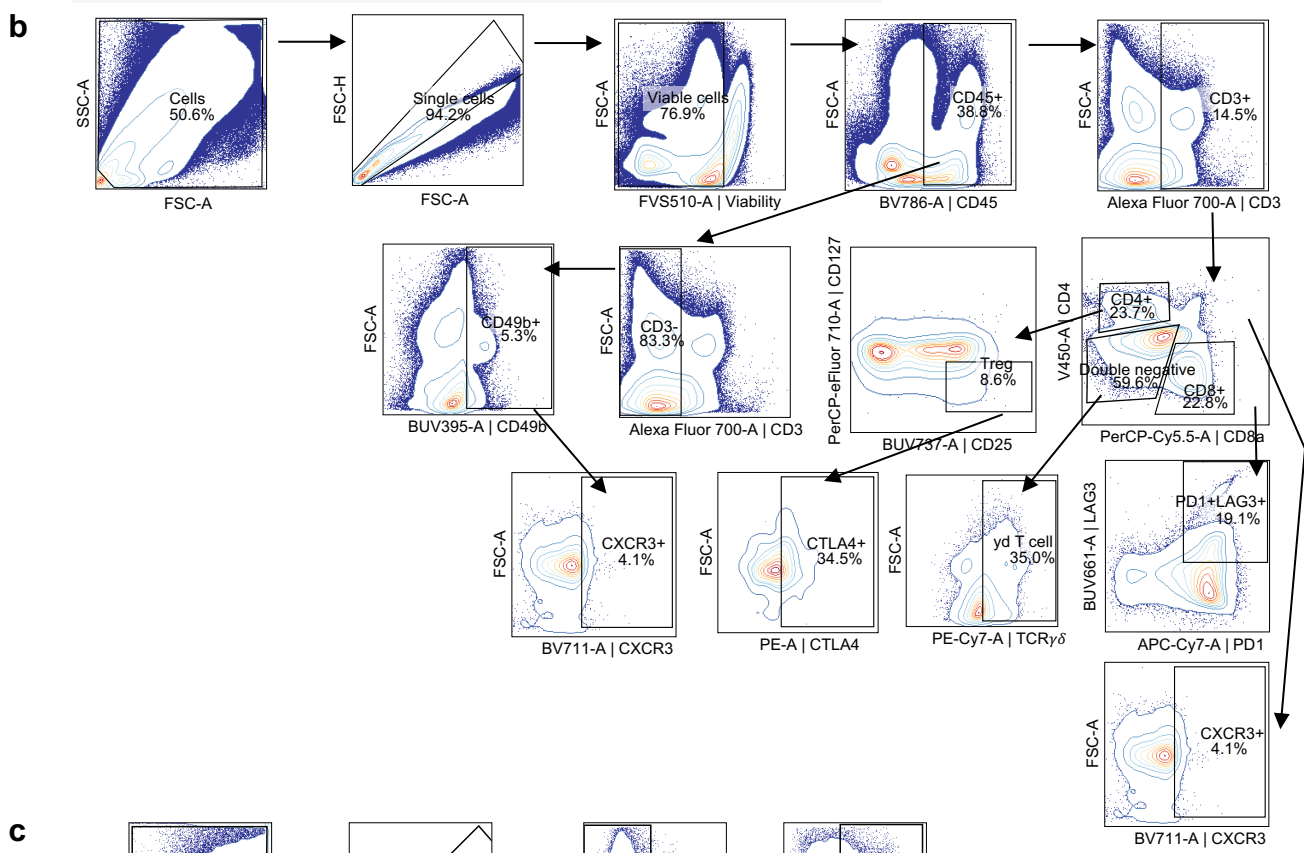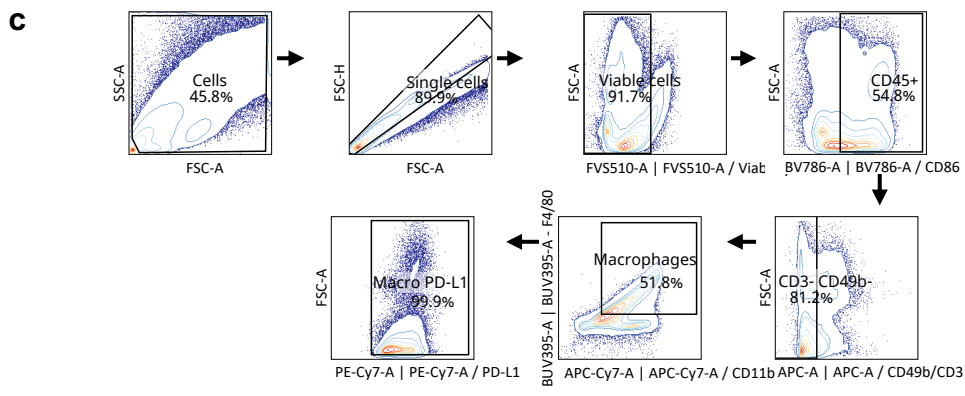

**Supplementary Fig. 14: Gating strategies for flow cytometry.** (a) Gating strategy for the intracellular staining of TNF $\alpha$  and IFN $\gamma$  in Fig. 5 (b-d). (b) Gating strategy for the T-cell and NK cell staining of CXCR3 and PD-L1 in Fig. 5 (e-g) and Supplementary Fig. 13 (b-f). (c) Gating strategy for PD-L1<sup>+</sup> macrophages in Supplementary Fig. 13 (g).

# Supplementary Fig. 15

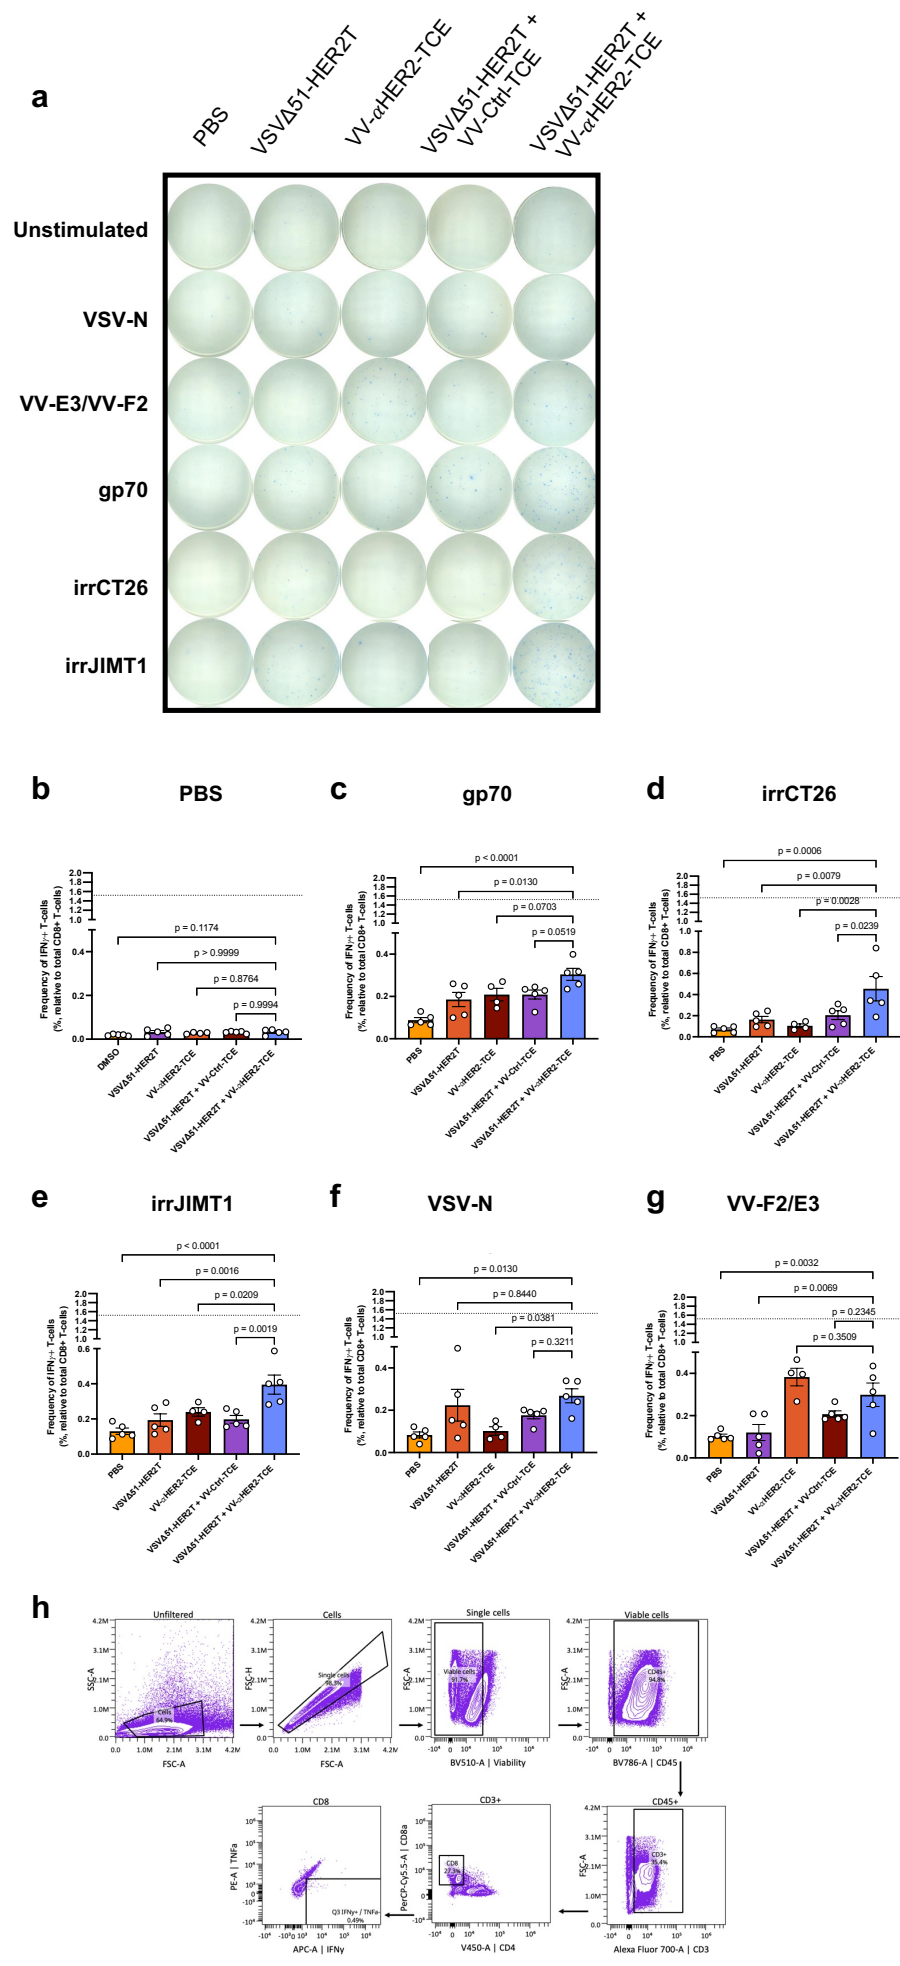

**Supplementary Fig. 15: Splenocytes harvested from mice 14 days post-treatment exhibit reactivity against tumour and viral antigens.** (a) Representative ELISpot wells from Fig. 5i-m. Following harvest of splenocytes from mice at day 14 post-treatment as indicated in Fig. 5h, splenocytes were used for intracellular cytokine staining (ICS). Splenocytes were analyzed by flow cytometric analysis for intracellular levels of IFN $\gamma$ , following 24 h *ex vivo* culture (Golgi plugged) stimulated by (b) PBS control, (c) 10  $\mu$ M gp70 peptide, (d) irradiated CT26 cells, (e) irradiated JIMT1 cells, (f) 10  $\mu$ M VSV-N peptide, (g) 10  $\mu$ M VV-F2/E3 peptides. Dotted lines indicate % IFN $\gamma$  positive CD8<sup>+</sup> T-cells following stimulation with PMA/ionomycin. (h) Gating strategy for quantifying IFN $\gamma$  cells in (b-g). (mean  $\pm$  SEM,  $n = 5$  mice per group;  $P$ -value calculated by one-way ANOVA relative to VV- $\alpha$ HER2-TCE + VSV $\Delta$ 51-HER2T, with Dunnett correction for multiple comparison.) Source data are provided as a Source Data file.

# Supplementary Fig. 16

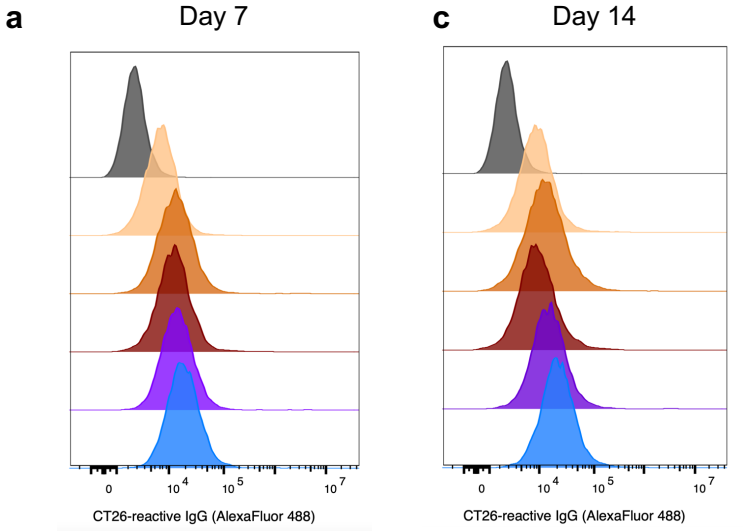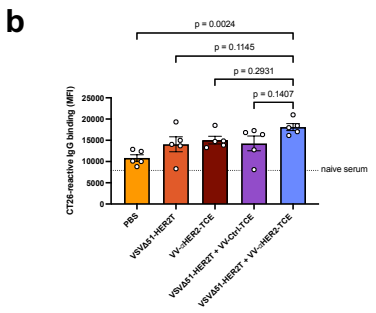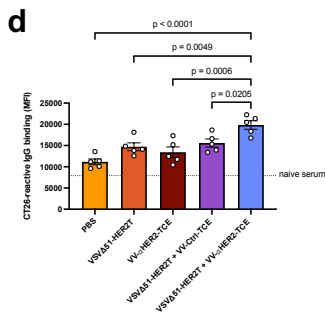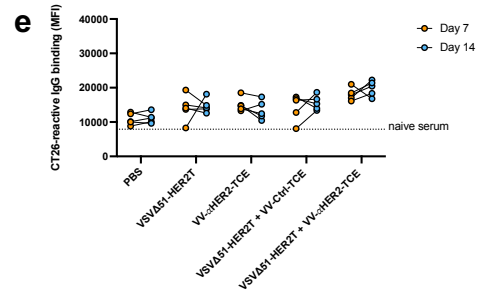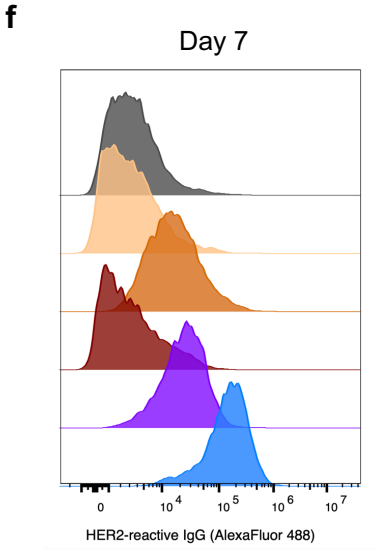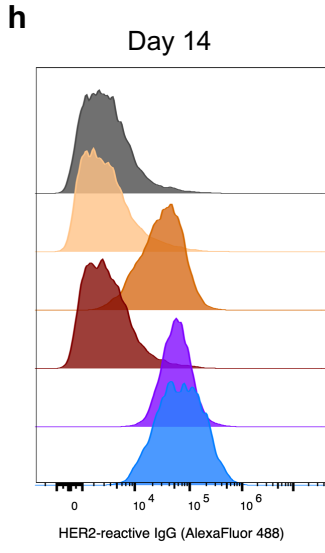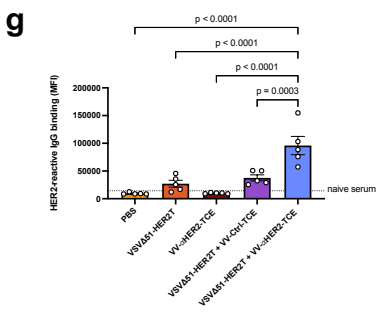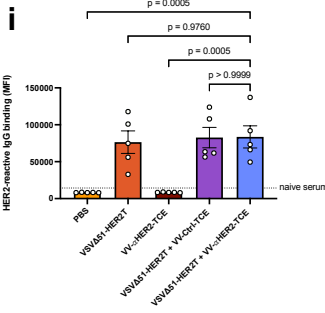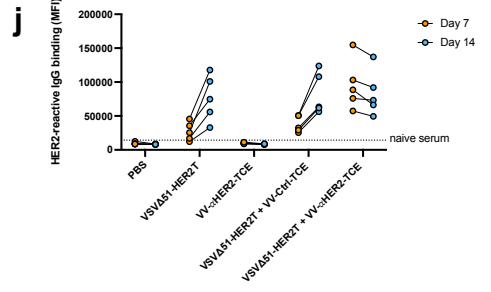



**Supplementary Fig. 16: CT26 tumour-bearing mice receiving intratumoural VSV $\Delta$ 51-HER2T+ VV- $\alpha$ HER2-TCE injections raise IgG against tumour and viral antigens.** Serum was isolated from the lateral saphenous vein bleeds from Fig. 5 h at day 7 and day 14 post-treatment. Serum was diluted (1:100) and incubated with  $5 \times 10^5$  cells as follows: (a-d) CT26 cells or (f-i) JIMT1 cells. Serum was washed off and IgG bound to cells was quantified using an anti-mouse IgG antibody (AlexaFluor<sup>TM</sup> Plus 488). Fluorescence signal was quantified by flow cytometry. (a-b, f-g) Serum collected at day 7; (c-d, h-i) serum collected at day 14. Change in the IgG reactivity between day 7 and 14 is plotted for (e) CT26 and (j) JIMT1. Dotted lines indicate signal obtained using serum from naïve mice. For all bar charts, mean  $\pm$  SEM,  $n = 5$  mice per group;  $P$ -value calculated by one-way ANOVA relative to VV- $\alpha$ HER2-TCE + VSV $\Delta$ 51-HER2T, with Dunnett correction for multiple comparison. Source data are provided as a Source Data file.

# Supplementary Fig. 17

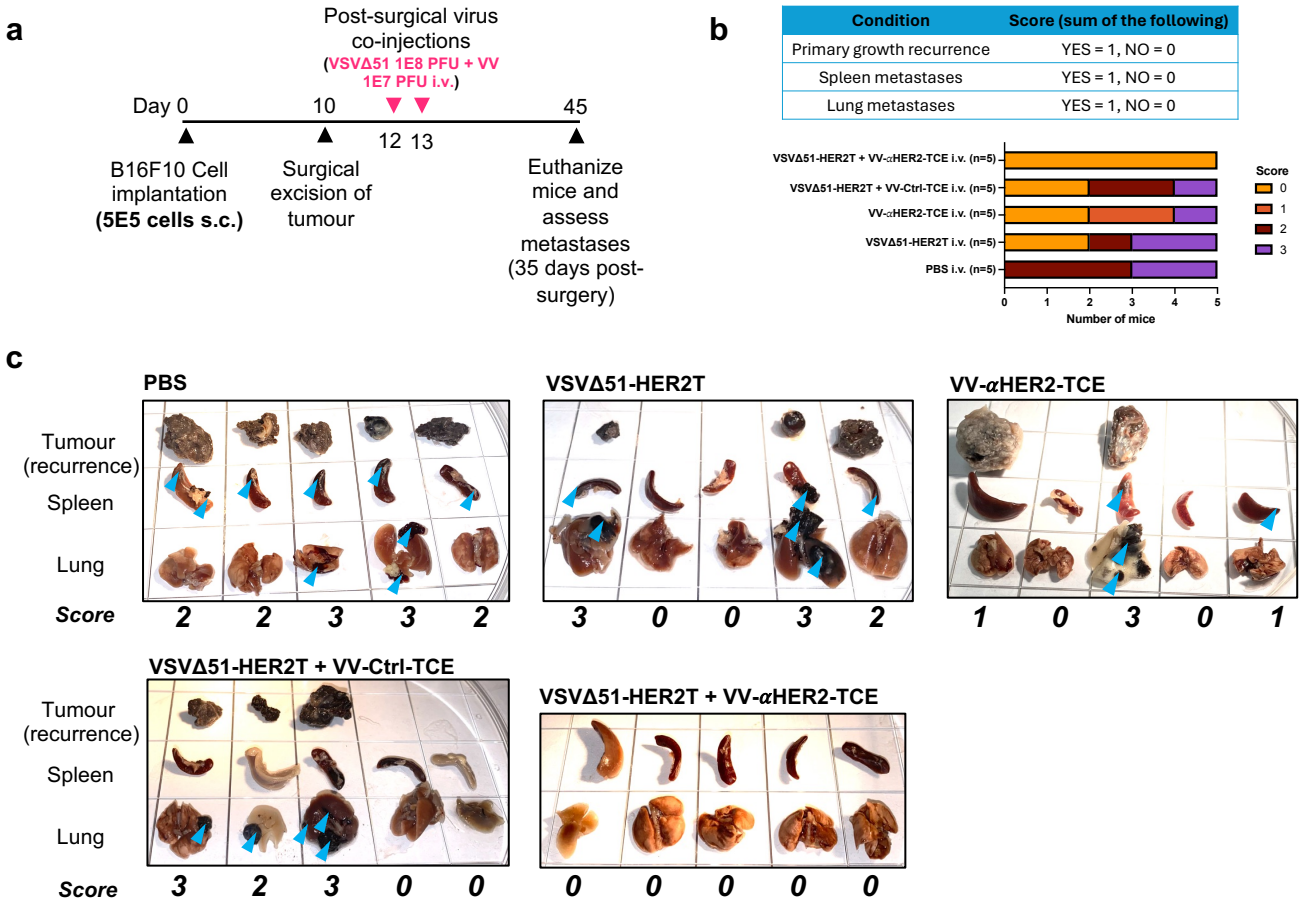

**Supplementary Fig. 17: Treatment of C57BL/6 mice with VSVΔ51-HER2T + VV-αHER2-TCE following surgical excision of B16-F10 tumours prevents tumour recurrence and metastasis.** (a) Experimental overview:  $5 \times 10^5$  B16-F10 cells were implanted orthotopically in C57BL/6 mice subcutaneously in the right flank. 10 days post-implantation, tumours were excised, and mice received intravenous injections of the indicated treatments 48 h post-surgery. Mice were monitored over time and euthanized at day 45, where lungs, spleens, and recurrent primary tumours were harvested. (b) Mice were scored ( $n = 5$  per group) as indicated. (c) Images of all recurrent primary tumours, spleens, and lungs. Blue arrows indicate black metastatic B16-F10 lesions within spleens and lungs. Numbers below the images indicate the score assigned. Source data are provided as a Source Data file.

# Supplementary Table 1

**Supplementary Table 1: Clinical characteristics of patient-derived tumour specimens.**

| Specimen         | ID     | TNM scoring     | HER2 status   | Pathology report                                                                                                                                       |
|------------------|--------|-----------------|---------------|--------------------------------------------------------------------------------------------------------------------------------------------------------|
| Ovarian 1        | GTC306 | N/A             | Unknown       | Ovarian mass with high grade carcinoma with mucinous differentiation and surface involvement                                                           |
| Ovarian 2        | GTC269 | PT3b, pN1a, pM1 | Unknown       | Dedifferentiated metastatic carcinoma with lymphovascular invasion. Left and right sides involved, including ovaries and fallopian tubes, and omentum. |
| Ovarian 3        | GTC262 | N/A             | Unknown       | Massive uterine fibroma extending from right ovary                                                                                                     |
| Endometrial<br>1 | GTC259 | pT2, Nx, Mx     | Unknown       | Uterine carcinosarcoma, mixed Mullerian tumour, positive for cervical stromal, lymphovascular, and myometrial invasion.                                |
| Breast 1         | GTC270 | pT2, Nx, Mx     | HER2-negative | Recurrent multifocal invasive ductal carcinoma, positive for lymphovascular invasion                                                                   |
| Renal 1          | GTC379 | pT3a, N0, Mx    | Unknown       | Clear cell carcinoma WHO nucleolar grade 4/4. Highly necrotic ~70%, no lymph node involvement                                                          |
| Lung 1           | GTC265 | pT2b, N1, Mx    | Unknown       | Invasive adenocarcinoma, micropapillary predominant, minor acinar, and lepidic growth patterns. Lymphovascular invasion present.                       |
| Parotid 1        | GTC344 | pT3, N0, Mx     | Unknown       | Adenoid cystic carcinoma with focal high-grade transformation.                                                                                         |
| Parotid 2        | GTC266 | N/A             | Unknown       | Parotid mass, adenoma/indolent neoplasm                                                                                                                |

## Supplementary Table 2

Supplementary Table 2: Clinical characteristics of patient-derived tumour specimens.

| Specimen             | ID     | TNM scoring   | HER2 status | Pathology report                                                                                                                                                                                     |
|----------------------|--------|---------------|-------------|------------------------------------------------------------------------------------------------------------------------------------------------------------------------------------------------------|
| Sarcoma              | GTC409 | pT2, pN0, pMx | Unknown     | Pleomorphic sarcoma, high grade, dermis and subcutaneous fibroadipose tissue, no muscular or lymphovascular invasion, 75% necrotic tissue consistent with previous radiotherapy.                     |
| Colon                | GTC411 | pT3, N0, Mx   | Unknown     | Invasive colorectal adenocarcinoma, WHO low grade, G2 moderated differentiated                                                                                                                       |
| NSCLC                | GTC413 | pT1c, pN0, Mx | Unknown     | Minimally-invasive non-mucinous adenocarcinoma; predominantly acinar. G1 well-differentiated, all margin uninvolved.                                                                                 |
| Ovarian              | GTC414 | pT1, Nx, Mx   | Unknown     | Left ovary endometrioid adenocarcinoma, negative for surface involvement. Absence of malignancy in omentum, ascitic fluid, and right ovary. G2 moderated differentiated. P53 normal, MMR proficient. |
| Basal cell carcinoma | GTC415 | pT3, N1, Mx   | Unknown     | Previous metastatic melanoma spread to left axillary lymph nodes. Axillary contents collected, 1/40 lymph nodes positive for malignancy.                                                             |

## Supplementary Table 3

**Supplementary Table 3: Cell lines.** \* = The MC38 cell line was a generous gift from Dr. Guy Ungerechts; \*\* = The ID8-PP cell line was a generous gift from Dr. Iain McNeish; \*\*\* = The primary human ovarian cancer cell lines (AF2068, AF2028, AF2780) were obtained from the Ottawa Ovarian Ethics Board (OHSN-REB 1999540-01H) with informed consent, and provided by Dr. Barbara Vanderhyden; \*\*\*\* = 4T1.2 and 4T1.2-HER2 cells were a generous gift from Dr. Michael Kershaw; ‡, †, † = These lines were generated as previously described. ATCC: American Type Culture Collection (Manassas, VA); DSMZ: Deutsche Sammlung von Mikroorganismen und Zellkulturen (Braunschweig, Germany); DMEM: Dulbecco's modified Eagle's medium (HyClone, Waltham, Massachusetts or Corning, Manassas, Virginia); RPMI: Roswell Park Memorial Institute medium (Hyclone, Cat. # SH3002701).

| Cell line                                      | Catalogue # | Host                 | Tissue origin          | Classification                     | Growth medium                                                                                                                                      | Source                                 |
|------------------------------------------------|-------------|----------------------|------------------------|------------------------------------|----------------------------------------------------------------------------------------------------------------------------------------------------|----------------------------------------|
| Vero                                           | CCL-81      | African green monkey | Kidney                 | -                                  | DMEM                                                                                                                                               | ATCC                                   |
| 786-O                                          | CRL-1932    | Human                | Kidney                 | Renal cell adenocarcinoma          | DMEM                                                                                                                                               | ATCC                                   |
| GM38                                           | GM00038     | Human                | Skin                   | Normal fibroblast                  | DMEM                                                                                                                                               | Coriell Institute for Medical Research |
| HT29                                           | HTB-38      | Human                | Colon                  | Colorectal adenocarcinoma          | RPMI                                                                                                                                               | ATCC                                   |
| JIMT-1                                         | ACC589      | Human                | Breast                 | Invasive ductal adenocarcinoma     | DMEM                                                                                                                                               | DSMZ                                   |
| U-2 OS                                         | HTB-96      | Human                | Bone                   | Osteosarcoma                       | RPMI                                                                                                                                               | ATCC                                   |
| HEK293T                                        | CRL-3216    | Human                | Kidney                 | Embryonic kidney                   | DMEM                                                                                                                                               | ATCC                                   |
| AF2068                                         | -           | Human                | Ovarian cancer ascites | Primary human ovarian cancer cells | RPMI                                                                                                                                               | ***                                    |
| AF2028                                         | -           | Human                | Ovarian cancer ascites | Primary human ovarian cancer cells | RPMI                                                                                                                                               | ***                                    |
| AF2780                                         | -           | Human                | Ovarian cancer ascites | Primary human ovarian cancer cells | RPMI                                                                                                                                               | ***                                    |
| SKOV3                                          | HTB-77      | Human                | Ovary                  | Ovarian adenocarcinoma             | RPMI                                                                                                                                               | ATCC                                   |
| OVCAR-4                                        | SCC258      | Human                | Ovarian cancer ascites | High grade serous carcinoma        | RPMI                                                                                                                                               | Millipore Sigma                        |
| J69 (Jurkat CD69-TdTomato)                     | -           | Human                | Lymphoblast            | T cell leukemia                    | RPMI                                                                                                                                               | ‡                                      |
| CT26.WT (CT26)                                 | CRL-2638    | Mouse (BALB/c)       | Colon                  | Colon adenocarcinoma               | DMEM                                                                                                                                               | ATCC                                   |
| CT26-HER2T                                     | -           | Mouse (BALB/c)       | Colon                  | Colon adenocarcinoma               | DMEM                                                                                                                                               | ††                                     |
| MC38                                           | -           | Mouse (C57BL/6)      | Colon                  | Colon adenocarcinoma               | DMEM                                                                                                                                               | *                                      |
| MC38-HER2T                                     | -           | Mouse (C57BL/6)      | Colon                  | Colon adenocarcinoma               | DMEM                                                                                                                                               | ††                                     |
| ID8 (Tp53 <sup>-/-</sup> Pten <sup>-/-</sup> ) | -           | Mouse (C57BL/6)      | Ovary                  | High-grade serous carcinoma        | DMEM supplemented with 4% FBS and 1% ITSS (5 µg/mL insulin, 5 µg/mL transferrin, and 5 ng/mL sodium selenite; R&D Systems, MN, USA, Cat. # AR013). | **                                     |
| ID8-PP-HER2T                                   | -           | Mouse (C57BL/6)      | Ovary                  | High-grade serous carcinoma        |                                                                                                                                                    | ††                                     |
| ID8-HER2T                                      | -           | Mouse (C57BL/6)      | Ovary                  | High-grade serous carcinoma        |                                                                                                                                                    | ††                                     |
| 4T1.2                                          | CRL-3406    | Mouse (BALB/c)       | Breast                 | Breast adenocarcinoma              | RPMI                                                                                                                                               | ATCC, ****                             |
| 4T1.2-HER2                                     | -           | Mouse (BALB/c)       | Breast                 | Breast adenocarcinoma              | RPMI                                                                                                                                               | ****                                   |
| 4T1.2-HER2T                                    | -           | Mouse (BALB/c)       | Breast                 | Breast adenocarcinoma              | RPMI                                                                                                                                               | ††                                     |
| B16-F10                                        | CRL-6475    | Mouse (C57BL/6)      | Skin                   | Melanoma                           | RPMI                                                                                                                                               | ATCC                                   |

## Supplementary Table 4

Supplementary Table 4: Antibodies used for flow cytometry.

| Antibody                            | Cat. #                                                     | Clone                 | Dilution |
|-------------------------------------|------------------------------------------------------------|-----------------------|----------|
| CD45-BV786                          | BD, 564225                                                 | 30-F11                | 1:1000   |
| CD3 $\epsilon$ -Alexa Fluor 700     | BD, 561805                                                 | SP34-2                | 1:300    |
| CD49b-BUV395                        | BD, 740250                                                 | HMa2                  | 1:100    |
| CD335-BUV805                        | BD, 742066                                                 | 29A1.4                | 1:100    |
| CD314-BUV496                        | BD, 750014                                                 | 9C11G4                | 1:100    |
| CD4-V450                            | BD, 560468                                                 | RM4-5                 | 1:1000   |
| CD8 $\alpha$ -PerCP-Cy5.5           | BD, 551162                                                 | 53-6.7                | 1:200    |
| TCR $\gamma/\delta$ -PE-Cy7         | Invitrogen, 25-5711-82                                     | eBioGL3 (GL-3, GL-3)  | 1:200    |
| CD25-BUV737                         | Invitrogen, 367-0251-82                                    | PC61.5                | 1:100    |
| CD69-BUV605                         | BD, 563290                                                 | H1.2F3                | 1:100    |
| PD-1-APC-Cy7                        | Biolegend, 135223                                          | 29F.1A12              | 1:100    |
| LAG3-BUV661                         | BD, 741594                                                 | C9B7W                 | 1:100    |
| CTLA-4-PE                           | Invitrogen, 12-1522-82                                     | UC10-4B9              | 1:200    |
| CD127-PerCP-eFluor 710              | Invitrogen, 46-1273-82                                     | eBioSB/199 (SB/199)   | 1:200    |
| CD62L-NovaFluor Blue 555            | Invitrogen, M006T02B03                                     | MEL-14                | 1:300    |
| CD44-APC                            | BD, 563058                                                 | IM7                   | 1:100    |
| CXCR3-BV711                         | BD, 740825                                                 | CXCR3-173             | 1:100    |
| CD103-BV421                         | Biolegend, 121421                                          | 2E7                   | 1:100    |
| CD39-PE-Fire 640                    | Biolegend, 143817                                          | Duha59                | 1:100    |
| CD27-BV650                          | BD, 740491                                                 | LG.3A10               | 1:200    |
| CD3 $\epsilon$ -APC                 | Biolegend, 100235                                          | 17A2                  | 1:200    |
| CD49b-APC                           | Biolegend, 108909                                          | DX5                   | 1:200    |
| CD19-PE-Cy5                         | Biolegend, 115509                                          | 6D5                   | 1:200    |
| CD11c-PE                            | BD, 553802                                                 | HL3                   | 1:100    |
| CD11b-APC-Cy7                       | Biolegend, 101225                                          | M1/70                 | 1:100    |
| F4/80-BUV395                        | BD, 565614                                                 | T45-2342              | 1:200    |
| MHCII (IA-IE)-BUV737                | Invitrogen, 367-5321-82                                    | M5/114.15.2           | 1:500    |
| CD86-APC-R700                       | BD, 565479                                                 | GL1                   | 1:200    |
| PD-L1-PE-Cy7                        | Biolegend, 124313                                          | 10F.9G2               | 1:100    |
| CD205-SB600                         | Invitrogen, 63-2051-82                                     | 205yekta              | 1:200    |
| CD1d-BV711                          | BD, 740711                                                 | 1B1                   | 1:100    |
| IFN $\gamma$ -APC                   | Invitrogen, 17-7311-82                                     | XMG1.2                | 1:100    |
| TNF $\alpha$ -PE                    | Biolegend, 506305                                          | MP6-XT22              | 1:100    |
| Trastuzumab (1 <sup>0</sup> )       | Herceptin®; Hoffman-La Roche, Mississauga, Ontario, Canada | N/A; Clinical grade   | 1:1000   |
| Anti-human IgG-PE (2 <sup>0</sup> ) | Invitrogen, PA1-86078                                      | N/A; RRID: AB_933621  | 1:300    |
| Anti-mouse IgG-AlexaFluor 488       | Invitrogen, A32723                                         | N/A; RRID: AB_2633275 | 1:300    |
